# Supplementary material for: Pentafluoroethyl-substituted α-silanes: model compounds for new insights
Source: Royal Society of Chemistry journal article supplement (doi:10.1039/c5dt02010g), 2015-01-01
Supplement: c5dt02010g1.pdf [file c5dt02010g1.pdf]

Table S1: Some torsional angles (in degrees) of  $(C_2F_5)_3SiONMe_2$  calculated using B3LYP/6-31G(d,p) approximation.

| Torsion angle             | conf1 | conf2  | conf3 | conf4 | conf5 |
|---------------------------|-------|--------|-------|-------|-------|
| $\varphi(C21-C14-Si1-O2)$ | -83.7 | -79.0  | -84.6 | -65.3 | 68.1  |
| $\varphi(C18-C13-Si1-O2)$ | -66.4 | -67.1  | -65.6 | -71.7 | 87.5  |
| $\varphi(C15-C12-Si1-O2)$ | -69.8 | -176.5 | 30.1  | 26.8  | -46.6 |

Table S2: Relative energies and abundances (%) for conformers of  $(C_2F_5)_3SiONMe_2$  calculated using B3LYP/6-31G(d,p) approximation.

| Conformer | $\Delta E$ , kcal mol <sup>-1</sup> | $\chi$ , % |
|-----------|-------------------------------------|------------|
| conf1     | 0.00                                | 54.6       |
| conf2     | 1.48                                | 3.8        |
| conf3     | 0.22                                | 36.5       |
| conf4     | 1.49                                | 3.8        |
| conf5     | 2.06                                | 1.3        |

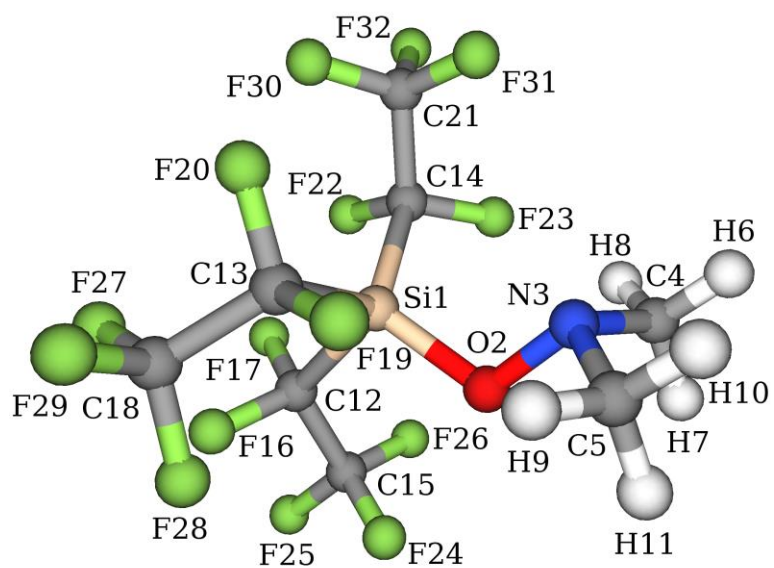

Figure S1: Effective structure of  $(C_2F_5)_3SiONMe_2$  refined in conf1MD model.

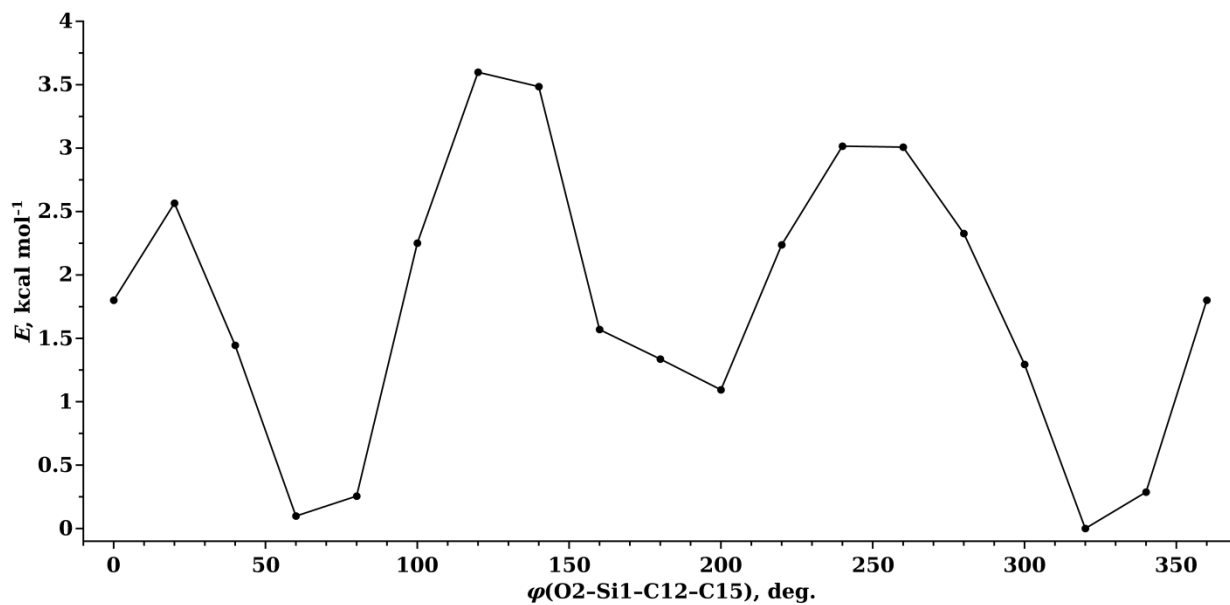

Figure S2. Potential function of  $(C_2F_5)_3SiONMe_2$  calculated on B3LYP/6-31G(d,p) level along dihedral angle  $\phi(O2-Si1-C12-C15)$  of conf5.

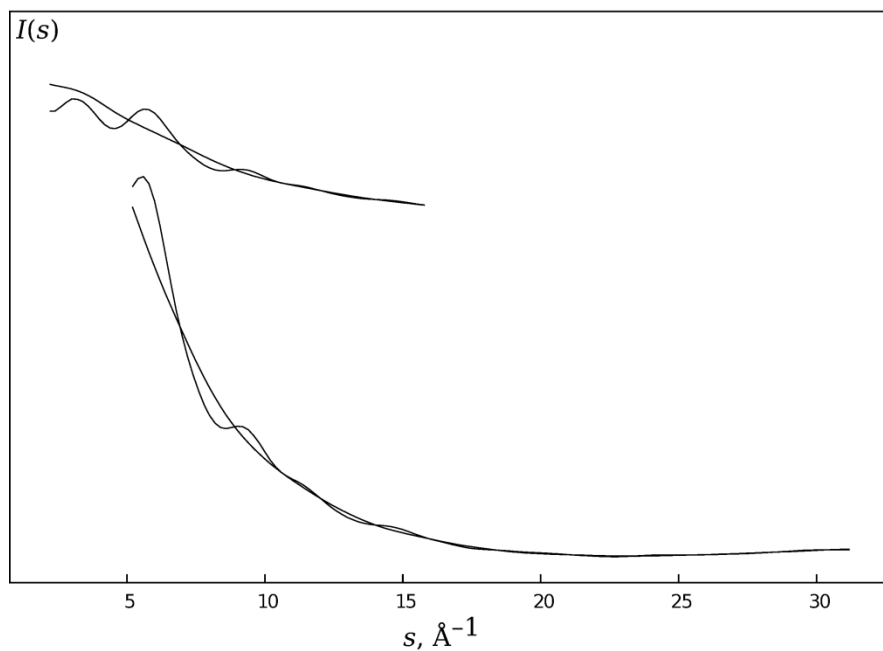

Figure S3. Total intensity functions of  $(C_2F_5)_3SiONMe_2$  and background lines in long and middle camera GED experiments.

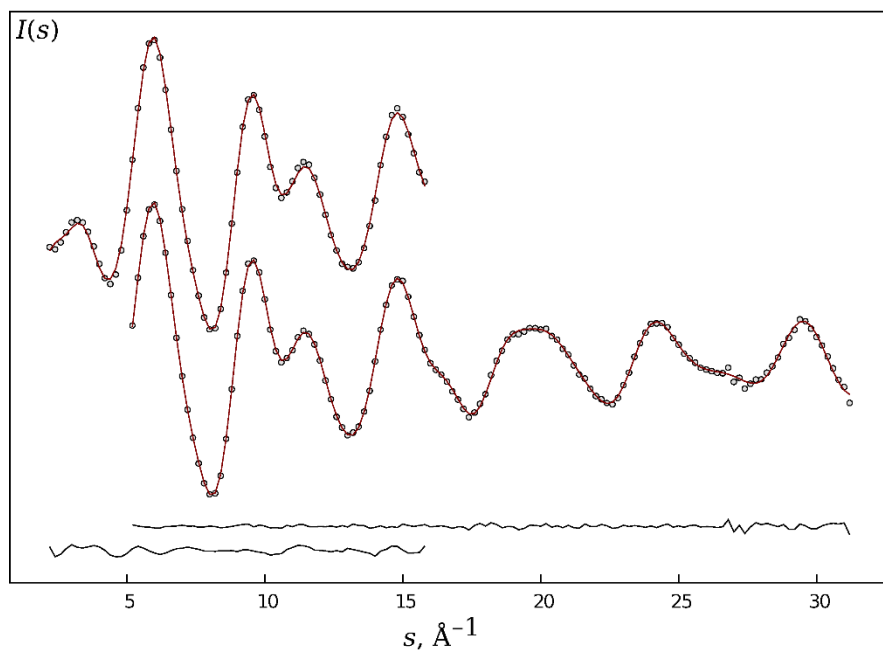

Figure S4. Experimental (dots) and model (lines) molecular  $sM(s)$  intensity functions of  $(\text{C}_2\text{F}_5)_3\text{SiONMe}_2$ .

Table S3. Details of GED experiments.

| Camera setting                                     | Short                | Long                 |
|----------------------------------------------------|----------------------|----------------------|
| Nozzle-to-plate distance, mm                       | 250.0                | 500.0                |
| Accelerating voltage, kV                           | 60                   | 60                   |
| Fast electrons current, <sup>a</sup> $\mu\text{A}$ | 1.07                 | 1.02                 |
| Electron wavelength, <sup>ab</sup> $\text{\AA}$    | 0.048646             | 0.048559             |
| Nozzle temperature, <sup>a</sup> K                 | 296                  | 266                  |
| Sample gas pressure, <sup>ac</sup> mbar            | $1.2 \times 10^{-6}$ | $0.7 \times 10^{-6}$ |
| Residual gas pressure, <sup>a</sup> mbar           | $1.1 \times 10^{-7}$ | $1.3 \times 10^{-7}$ |
| Exposure time, <sup>a</sup> sec                    | 5                    | 6                    |
| Used $s$ range, $\text{\AA}^{-1}$                  | 5.2 – 31.2           | 2.2 – 15.8           |
| Number of inflection points <sup>d</sup>           | 5                    | 4                    |

<sup>a</sup> Average values.

<sup>b</sup> Determined from  $\text{CCl}_4$  diffraction patterns measured in the same experiment.

<sup>c</sup> Pressure in the chamber during the measurement.

<sup>d</sup> Number of inflection points on the background line.

Table S4. Refined in conf1MD model effective interatomic distances ( $r_{a,\text{exp}}$ ) and amplitudes ( $l_{\text{exp}}$ ), calculated amplitudes and corrections using Shrink program ( $l_{\text{Shr}}$ ,  $c_{\text{Shr}}$ ) and molecular dynamics simulations ( $l_{\text{MD}}$ ,  $c_{\text{MD}}$ ) for  $(\text{C}_2\text{F}_5)_3\text{SiONMe}_2$ . All quantities are in Å.

| Term |     | $r_{a,\text{exp}}$ | $l_{\text{exp}}$ | $l_{\text{MD}}$ | $l_{\text{Shr}}$ | $c_{\text{MD}}$ | $c_{\text{Shr}}$ |
|------|-----|--------------------|------------------|-----------------|------------------|-----------------|------------------|
| C5   | H9  | 1.087800           | 0.084354         | 0.076100        | 0.075700         | -0.006600       | -0.016100        |
| C4   | H8  | 1.088369           | 0.084022         | 0.075800        | 0.075800         | -0.005600       | -0.016100        |
| C4   | H6  | 1.088538           | 0.085019         | 0.076700        | 0.076300         | -0.001800       | -0.016400        |
| C5   | H10 | 1.094834           | 0.084243         | 0.076000        | 0.076300         | -0.007100       | -0.016400        |
| C4   | H7  | 1.096543           | 0.085573         | 0.077200        | 0.077200         | -0.005700       | -0.016900        |
| C5   | H11 | 1.092452           | 0.086017         | 0.077600        | 0.077200         | -0.001400       | -0.016700        |
| F29  | C18 | 1.331305           | 0.049216         | 0.044400        | 0.044200         | -0.007500       | -0.006300        |
| F25  | C15 | 1.332433           | 0.048772         | 0.044000        | 0.044200         | -0.008300       | -0.005800        |
| F27  | C18 | 1.323037           | 0.050103         | 0.045200        | 0.044200         | -0.003800       | -0.005300        |
| F32  | C21 | 1.328440           | 0.049659         | 0.044800        | 0.044400         | -0.004200       | -0.005900        |
| F31  | C21 | 1.336356           | 0.052541         | 0.047400        | 0.044400         | -0.005800       | -0.005900        |
| F26  | C15 | 1.334848           | 0.048662         | 0.043900        | 0.044400         | -0.009500       | -0.005100        |
| F30  | C21 | 1.325076           | 0.050103         | 0.045200        | 0.044400         | -0.001900       | -0.004700        |
| F24  | C15 | 1.335652           | 0.050324         | 0.045400        | 0.044600         | -0.004600       | -0.005900        |
| F28  | C18 | 1.332450           | 0.050103         | 0.045200        | 0.045000         | 0.002700        | -0.004400        |
| F17  | C12 | 1.359410           | 0.052209         | 0.047100        | 0.045900         | -0.006100       | -0.006200        |
| F20  | C13 | 1.363741           | 0.051987         | 0.046900        | 0.046100         | -0.007500       | -0.004700        |
| F22  | C14 | 1.362970           | 0.051322         | 0.046300        | 0.046200         | -0.007200       | -0.005800        |
| F19  | C13 | 1.368710           | 0.051987         | 0.046900        | 0.046200         | -0.009300       | -0.008300        |
| F16  | C12 | 1.376077           | 0.051544         | 0.046500        | 0.046300         | -0.009700       | -0.005200        |
| F23  | C14 | 1.368068           | 0.051987         | 0.046900        | 0.046500         | -0.003600       | -0.005100        |
| N3   | C4  | 1.468194           | 0.055977         | 0.050500        | 0.049400         | -0.006900       | -0.009500        |
| N3   | C5  | 1.467212           | 0.055201         | 0.049800        | 0.049400         | -0.008100       | -0.009600        |
| O2   | N3  | 1.495946           | 0.058749         | 0.053000        | 0.052400         | -0.007900       | -0.007000        |
| C13  | C18 | 1.550056           | 0.058749         | 0.053000        | 0.050900         | -0.009500       | -0.011100        |
| C12  | C15 | 1.550201           | 0.057973         | 0.052300        | 0.050800         | -0.012900       | -0.011500        |
| C21  | C14 | 1.552984           | 0.065178         | 0.058800        | 0.051000         | -0.012300       | -0.009500        |
| Si1  | O2  | 1.744517           | 0.049437         | 0.044600        | 0.043600         | -0.004900       | -0.003400        |
| H9   | H10 | 1.747278           | 0.145320         | 0.131100        | 0.123100         | 0.022300        | -0.016200        |
| H6   | H8  | 1.757647           | 0.144211         | 0.130100        | 0.123200         | 0.014800        | -0.017200        |
| H9   | H11 | 1.721721           | 0.137006         | 0.123600        | 0.122300         | 0.055500        | -0.019800        |
| H7   | H8  | 1.744460           | 0.137893         | 0.124400        | 0.122300         | 0.034300        | -0.017900        |
| H10  | H11 | 1.777066           | 0.143768         | 0.129700        | 0.123400         | 0.011000        | -0.017700        |

|     |     |          |          |          |          |           |           |
|-----|-----|----------|----------|----------|----------|-----------|-----------|
| H6  | H7  | 1.776846 | 0.140442 | 0.126700 | 0.123300 | 0.010400  | -0.017600 |
| Si1 | C12 | 1.982797 | 0.062541 | 0.062300 | 0.054000 | -0.019100 | -0.009000 |
| Si1 | C13 | 1.976863 | 0.062541 | 0.062300 | 0.054600 | -0.014800 | -0.008000 |
| Si1 | C14 | 1.973687 | 0.062140 | 0.061900 | 0.054200 | -0.015500 | -0.009600 |
| N3  | H10 | 2.054066 | 0.115345 | 0.114900 | 0.105900 | 0.010600  | -0.015300 |
| N3  | H6  | 2.063799 | 0.114241 | 0.113800 | 0.105800 | 0.008600  | -0.014600 |
| N3  | H8  | 2.094011 | 0.113940 | 0.113500 | 0.102600 | 0.001400  | -0.019100 |
| N3  | H9  | 2.085436 | 0.115345 | 0.114900 | 0.102600 | 0.008900  | -0.017400 |
| N3  | H7  | 2.092428 | 0.108720 | 0.108300 | 0.102400 | -0.001900 | -0.022800 |
| N3  | H11 | 2.092367 | 0.111229 | 0.110800 | 0.102300 | 0.004200  | -0.021900 |
| F31 | F32 | 2.156319 | 0.056719 | 0.056500 | 0.056400 | -0.008500 | -0.010000 |
| F27 | F29 | 2.147936 | 0.058124 | 0.057900 | 0.056300 | -0.000200 | -0.006800 |
| F25 | F26 | 2.151853 | 0.056920 | 0.056700 | 0.056500 | -0.001900 | -0.006700 |
| F30 | F32 | 2.149111 | 0.057321 | 0.057100 | 0.056600 | 0.002600  | -0.007100 |
| F24 | F25 | 2.154571 | 0.057723 | 0.057500 | 0.056600 | 0.000800  | -0.007100 |
| F30 | F31 | 2.154453 | 0.057823 | 0.057600 | 0.056700 | -0.001000 | -0.005500 |
| F24 | F26 | 2.156376 | 0.057321 | 0.057100 | 0.056700 | -0.000900 | -0.006500 |
| F28 | F29 | 2.152543 | 0.058124 | 0.057900 | 0.056800 | 0.002700  | -0.007200 |
| F27 | F28 | 2.158174 | 0.057221 | 0.057000 | 0.056800 | -0.001300 | -0.005600 |
| F16 | F17 | 2.235572 | 0.060132 | 0.059900 | 0.059800 | -0.001300 | -0.007500 |
| F19 | F20 | 2.222051 | 0.059329 | 0.059100 | 0.059700 | 0.000000  | -0.008700 |
| F22 | F23 | 2.226432 | 0.062240 | 0.062000 | 0.060000 | 0.005200  | -0.005300 |
| F22 | C21 | 2.316318 | 0.079105 | 0.078800 | 0.066200 | -0.013800 | -0.014800 |
| F19 | C18 | 2.322917 | 0.072379 | 0.072100 | 0.066200 | -0.007000 | -0.017700 |
| F16 | C15 | 2.315649 | 0.071677 | 0.071400 | 0.066700 | -0.005900 | -0.013900 |
| F23 | C21 | 2.327936 | 0.076295 | 0.076000 | 0.066800 | -0.005300 | -0.007800 |
| O2  | C4  | 2.305241 | 0.072982 | 0.072700 | 0.068500 | -0.008500 | -0.011700 |
| F20 | C18 | 2.323248 | 0.071978 | 0.071700 | 0.067100 | -0.003900 | -0.009700 |
| F17 | C15 | 2.328219 | 0.073283 | 0.073000 | 0.067100 | -0.005500 | -0.012000 |
| O2  | C5  | 2.318795 | 0.073183 | 0.072900 | 0.069200 | 0.000600  | -0.011400 |
| F32 | C14 | 2.364565 | 0.076596 | 0.076300 | 0.065500 | -0.019000 | -0.012500 |
| C13 | F28 | 2.366781 | 0.077399 | 0.077100 | 0.067300 | -0.012000 | -0.013900 |
| C12 | F24 | 2.365114 | 0.076395 | 0.076100 | 0.067500 | -0.015300 | -0.014200 |
| F27 | C13 | 2.373232 | 0.074186 | 0.073900 | 0.067200 | -0.012300 | -0.010300 |
| C12 | F26 | 2.376774 | 0.078603 | 0.078300 | 0.067300 | -0.016400 | -0.011300 |
| C12 | F25 | 2.358178 | 0.073684 | 0.073400 | 0.066000 | -0.002300 | -0.014400 |
| C13 | F29 | 2.358782 | 0.072179 | 0.071900 | 0.065900 | -0.005000 | -0.013900 |
| F30 | C14 | 2.367760 | 0.077399 | 0.077100 | 0.067700 | -0.010700 | -0.011600 |
| F31 | C14 | 2.375176 | 0.076897 | 0.076600 | 0.067600 | -0.001500 | -0.008100 |

|     |     |          |          |          |          |           |           |
|-----|-----|----------|----------|----------|----------|-----------|-----------|
| C4  | C5  | 2.438154 | 0.075090 | 0.074800 | 0.067900 | -0.004700 | -0.013200 |
| H6  | H10 | 2.623901 | 0.265023 | 0.264000 | 0.226800 | -0.032400 | -0.020000 |
| H7  | H11 | 2.307141 | 0.256892 | 0.255900 | 0.232100 | 0.002900  | -0.038600 |
| Si1 | N3  | 2.664593 | 0.166242 | 0.165600 | 0.129900 | -0.071200 | -0.099900 |
| F28 | H9  | 1.984318 | 3.251567 | 2.933400 | 0.328500 | 1.999400  | -0.176600 |
| O2  | H7  | 2.517251 | 0.240968 | 0.193200 | 0.171300 | -0.032000 | -0.022300 |
| O2  | H11 | 2.557450 | 0.250447 | 0.200800 | 0.173200 | -0.003600 | -0.013400 |
| F23 | H8  | 1.163901 | 2.783684 | 2.511300 | 0.303200 | 0.987700  | -0.097100 |
| O2  | H8  | 2.524758 | 0.233859 | 0.187500 | 0.160100 | -0.000200 | -0.014200 |
| O2  | H9  | 2.498678 | 0.243837 | 0.195500 | 0.160800 | 0.028200  | -0.020700 |
| F19 | H9  | 0.982518 | 2.806186 | 2.531600 | 0.337700 | 1.175400  | -0.106900 |
| F22 | F32 | 2.779988 | 0.209039 | 0.167600 | 0.129300 | -0.141300 | -0.068200 |
| F19 | F29 | 2.617652 | 0.184593 | 0.148000 | 0.125000 | -0.026700 | 0.001100  |
| F16 | F25 | 2.645289 | 0.208415 | 0.167100 | 0.132800 | -0.015100 | 0.005700  |
| C4  | H10 | 2.775275 | 0.232362 | 0.186300 | 0.158100 | -0.024200 | -0.009300 |
| C5  | H6  | 2.736669 | 0.225003 | 0.180400 | 0.157100 | -0.015800 | -0.015800 |
| Si1 | F22 | 2.732497 | 0.124974 | 0.100200 | 0.084300 | -0.043200 | -0.013000 |
| F31 | H8  | 2.412433 | 3.016129 | 2.721000 | 0.352800 | 1.330900  | -0.251500 |
| Si1 | F16 | 2.694129 | 0.112377 | 0.090100 | 0.083300 | -0.022600 | -0.004800 |
| C5  | H7  | 2.622245 | 0.223257 | 0.179000 | 0.154500 | -0.001800 | -0.019900 |
| C4  | H11 | 2.589878 | 0.222259 | 0.178200 | 0.156000 | 0.008200  | -0.025400 |
| F23 | F31 | 2.815539 | 0.225876 | 0.181100 | 0.143900 | -0.100100 | -0.054200 |
| F20 | F27 | 2.674251 | 0.203301 | 0.163000 | 0.134900 | -0.033200 | 0.018300  |
| Si1 | F23 | 2.719245 | 0.119985 | 0.096200 | 0.081900 | -0.002700 | 0.001100  |
| F17 | F26 | 2.707607 | 0.210286 | 0.168600 | 0.141900 | -0.023800 | 0.015900  |
| Si1 | F20 | 2.701318 | 0.120235 | 0.096400 | 0.086200 | -0.004700 | -0.018500 |
| Si1 | F19 | 2.717139 | 0.119736 | 0.096000 | 0.082400 | 0.029400  | 0.015700  |
| F23 | F32 | 2.601824 | 0.180227 | 0.144500 | 0.148100 | 0.084500  | 0.046900  |
| Si1 | F17 | 2.748475 | 0.116867 | 0.093700 | 0.084100 | 0.033800  | -0.001700 |
| F17 | F25 | 2.723393 | 0.218268 | 0.175000 | 0.144100 | 0.020600  | -0.038200 |
| F20 | F29 | 2.740734 | 0.198437 | 0.159100 | 0.141900 | 0.034200  | -0.034600 |
| F19 | F28 | 2.771768 | 0.204548 | 0.164000 | 0.139200 | 0.019600  | -0.045200 |
| F16 | F24 | 2.728525 | 0.223756 | 0.179400 | 0.147200 | 0.007000  | -0.040800 |
| F22 | F30 | 2.624819 | 0.194321 | 0.155800 | 0.152800 | 0.084300  | 0.040000  |
| F22 | F26 | 3.889969 | 0.490173 | 0.357000 | 0.226500 | -0.274200 | -0.111100 |
| F16 | F27 | 2.246441 | 0.368936 | 0.295800 | 0.218900 | -0.086800 | -0.089400 |
| F20 | F30 | 2.864729 | 0.475893 | 0.346600 | 0.227200 | -0.202900 | -0.051400 |
| F23 | F26 | 3.836934 | 0.528343 | 0.384800 | 0.248600 | -0.101000 | -0.093500 |
| F19 | F30 | 4.610051 | 0.560610 | 0.408300 | 0.239300 | -0.102100 | -0.126200 |

|     |     |          |          |          |          |           |           |
|-----|-----|----------|----------|----------|----------|-----------|-----------|
| O2  | C12 | 2.986400 | 0.279882 | 0.224400 | 0.092400 | -0.119800 | -0.004000 |
| F27 | F17 | 3.599746 | 0.482347 | 0.351300 | 0.247600 | -0.160300 | -0.112500 |
| O2  | F16 | 3.841270 | 0.314425 | 0.229000 | 0.169900 | -0.264800 | -0.014900 |
| Si1 | C15 | 3.033932 | 0.134557 | 0.098000 | 0.075300 | -0.055200 | -0.022200 |
| Si1 | C18 | 3.046827 | 0.143757 | 0.104700 | 0.075600 | -0.048100 | -0.023200 |
| F31 | N3  | 4.630850 | 2.167801 | 0.526500 | 0.190300 | -0.956900 | -0.058500 |
| O2  | C13 | 2.963292 | 0.269252 | 0.196100 | 0.091200 | 0.093200  | 0.001200  |
| F22 | F17 | 2.325833 | 0.429210 | 0.312600 | 0.228400 | -0.083700 | 0.009400  |
| H7  | H10 | 3.058863 | 0.419462 | 0.305500 | 0.253800 | 0.018500  | 0.004800  |
| H6  | H11 | 2.951776 | 0.366316 | 0.293700 | 0.254800 | 0.027900  | -0.015400 |
| O2  | C14 | 2.981264 | 0.236299 | 0.172100 | 0.089600 | 0.084500  | -0.007800 |
| Si1 | C21 | 3.016430 | 0.136891 | 0.099700 | 0.071400 | 0.018500  | -0.018700 |
| F19 | N3  | 3.775854 | 1.165431 | 0.848800 | 0.178700 | -0.616600 | -0.116800 |
| F20 | F22 | 4.121038 | 0.379781 | 0.276600 | 0.233600 | -0.032300 | -0.033100 |
| O2  | F24 | 3.050753 | 0.310306 | 0.226000 | 0.228600 | -0.485700 | 0.003000  |
| F31 | C4  | 5.831315 | 2.000635 | 0.485900 | 0.248600 | -1.699900 | -0.237600 |
| F27 | C12 | 3.208398 | 0.307559 | 0.224000 | 0.166600 | -0.142700 | -0.114500 |
| F30 | C13 | 3.719268 | 0.348613 | 0.253900 | 0.169300 | -0.172100 | -0.109700 |
| C14 | C12 | 3.076675 | 0.178632 | 0.130100 | 0.094600 | -0.030400 | -0.018500 |
| F31 | H6  | 1.785769 | 3.557503 | 3.209400 | 0.393500 | 2.478800  | -0.288400 |
| C13 | C12 | 3.095452 | 0.161881 | 0.117900 | 0.095100 | -0.022000 | -0.017600 |
| F22 | C12 | 2.986495 | 0.282158 | 0.205500 | 0.149600 | -0.121000 | -0.023300 |
| C14 | F26 | 3.977590 | 0.391315 | 0.285000 | 0.173900 | -0.154800 | -0.109000 |
| C13 | C14 | 3.474754 | 0.157212 | 0.114500 | 0.094300 | -0.014300 | -0.008200 |
| F20 | F17 | 4.337673 | 0.373301 | 0.299300 | 0.238500 | 0.039300  | -0.045300 |
| C13 | H9  | 2.872989 | 2.347194 | 1.881900 | 0.253700 | 0.312400  | -0.149900 |
| C14 | H8  | 2.898295 | 2.356298 | 1.889200 | 0.242300 | 0.286200  | -0.161300 |
| Si1 | F24 | 3.281967 | 0.284493 | 0.207200 | 0.159100 | -0.126600 | -0.001800 |
| F20 | C14 | 3.503460 | 0.283669 | 0.206600 | 0.156000 | -0.029000 | -0.017000 |
| O2  | F23 | 3.023394 | 0.370719 | 0.270000 | 0.161800 | 0.031500  | 0.006100  |
| Si1 | F28 | 3.297132 | 0.277902 | 0.202400 | 0.158500 | -0.086400 | 0.012400  |
| F19 | C5  | 4.242354 | 3.734052 | 0.906900 | 0.256300 | -1.217900 | -0.147700 |
| F17 | C13 | 3.896394 | 0.289161 | 0.210600 | 0.161500 | 0.019900  | -0.027000 |
| O2  | H6  | 3.270038 | 0.160920 | 0.117200 | 0.099700 | -0.006300 | -0.012500 |
| F16 | F28 | 1.967775 | 0.706288 | 0.514400 | 0.355500 | -0.150300 | 0.097400  |
| F23 | F24 | 4.880557 | 0.735122 | 0.535400 | 0.394100 | -0.153400 | 0.021000  |
| O2  | H10 | 3.267820 | 0.166549 | 0.121300 | 0.100000 | 0.009700  | -0.012000 |
| O2  | F28 | 3.843914 | 0.532874 | 0.388100 | 0.225000 | -0.051800 | 0.012300  |
| N3  | C14 | 3.685497 | 0.860068 | 0.626400 | 0.175100 | -0.242300 | -0.105100 |

|     |     |          |          |          |          |           |           |
|-----|-----|----------|----------|----------|----------|-----------|-----------|
| C18 | H9  | 3.527257 | 2.438815 | 2.429400 | 0.264500 | 0.593400  | -0.159300 |
| Si1 | F30 | 3.420960 | 0.244537 | 0.178100 | 0.142500 | -0.099800 | -0.078400 |
| Si1 | F27 | 3.428647 | 0.237535 | 0.173000 | 0.132300 | -0.050500 | -0.067900 |
| F19 | O2  | 2.885208 | 0.316621 | 0.230600 | 0.155000 | 0.231500  | 0.037200  |
| C5  | H8  | 3.363878 | 0.166137 | 0.121000 | 0.100400 | -0.000600 | -0.017700 |
| C4  | H9  | 3.364904 | 0.172865 | 0.125900 | 0.100300 | -0.005800 | -0.016400 |
| F16 | C18 | 2.371268 | 0.434153 | 0.316200 | 0.202000 | -0.094600 | -0.000500 |
| Si1 | H8  | 3.485540 | 0.353556 | 0.257500 | 0.190900 | -0.081600 | -0.090900 |
| C13 | N3  | 3.650512 | 0.988172 | 0.719700 | 0.153900 | -0.152500 | -0.139100 |
| Si1 | F26 | 3.422813 | 0.279275 | 0.203400 | 0.143800 | -0.045400 | -0.049600 |
| F23 | C15 | 4.397354 | 0.371955 | 0.270900 | 0.208000 | -0.109100 | -0.038700 |
| Si1 | H9  | 3.450141 | 0.388706 | 0.283100 | 0.196000 | -0.049500 | -0.091500 |
| F28 | C5  | 5.702943 | 4.317073 | 1.048500 | 0.272500 | -0.916200 | -0.117900 |
| C21 | H8  | 3.304015 | 3.048271 | 2.444000 | 0.275300 | 0.717300  | -0.213000 |
| Si1 | F31 | 3.206790 | 0.269115 | 0.196000 | 0.147300 | 0.187100  | 0.047100  |
| F23 | C4  | 4.284506 | 2.388492 | 0.580100 | 0.260100 | -1.233800 | -0.062200 |
| Si1 | C4  | 3.618214 | 0.205818 | 0.149900 | 0.119600 | -0.067900 | -0.084800 |
| F22 | C15 | 4.012651 | 0.447472 | 0.325900 | 0.185400 | -0.166900 | -0.058300 |
| Si1 | C5  | 3.612941 | 0.219548 | 0.159900 | 0.125500 | -0.057200 | -0.083600 |
| F19 | F27 | 3.472580 | 0.089796 | 0.065400 | 0.064500 | 0.002500  | -0.008300 |
| F16 | F26 | 3.463640 | 0.095151 | 0.069300 | 0.064500 | 0.019100  | -0.004600 |
| F22 | F31 | 3.470609 | 0.097897 | 0.071300 | 0.065700 | 0.014000  | -0.014100 |
| F17 | F24 | 3.475502 | 0.093229 | 0.067900 | 0.063800 | 0.009400  | -0.007400 |
| F30 | F23 | 3.465232 | 0.098172 | 0.071500 | 0.064000 | 0.024200  | -0.005400 |
| F20 | F28 | 3.478258 | 0.090620 | 0.066000 | 0.063700 | 0.005600  | -0.004800 |
| F16 | C13 | 2.856168 | 0.315935 | 0.230100 | 0.149400 | -0.008200 | 0.013900  |
| O2  | C15 | 3.262454 | 0.418363 | 0.304700 | 0.154400 | -0.247100 | 0.001000  |
| F22 | C13 | 4.125073 | 0.292181 | 0.212800 | 0.163400 | -0.013700 | -0.017100 |
| F19 | C21 | 4.564516 | 0.387745 | 0.282400 | 0.196800 | 0.095700  | 0.013800  |
| F23 | C12 | 3.789923 | 0.276254 | 0.201200 | 0.148000 | -0.009000 | -0.005500 |
| F20 | C12 | 3.905752 | 0.308795 | 0.224900 | 0.165200 | -0.004600 | -0.035800 |
| F23 | N3  | 3.303110 | 0.884233 | 0.644000 | 0.215800 | -0.099100 | -0.032200 |
| F17 | C14 | 2.995694 | 0.337629 | 0.245900 | 0.162600 | 0.022400  | 0.011100  |
| C14 | C15 | 4.102295 | 0.300282 | 0.218700 | 0.130300 | -0.097600 | -0.051700 |
| C12 | C18 | 3.246737 | 0.280099 | 0.204000 | 0.127200 | -0.084400 | -0.037900 |
| F19 | C14 | 4.255633 | 0.275842 | 0.200900 | 0.147500 | 0.069200  | 0.022900  |
| F20 | C21 | 3.382686 | 0.486603 | 0.354400 | 0.185300 | -0.049100 | -0.015500 |
| F17 | C18 | 4.047126 | 0.388431 | 0.282900 | 0.200100 | -0.073700 | -0.057600 |
| N3  | C21 | 4.403277 | 1.458573 | 1.062300 | 0.185300 | -0.247000 | -0.133200 |



|     |     |          |          |          |          |           |           |
|-----|-----|----------|----------|----------|----------|-----------|-----------|
| C13 | C21 | 3.868727 | 0.248931 | 0.181300 | 0.124200 | -0.001700 | -0.017100 |
| H8  | H10 | 3.738825 | 0.294104 | 0.214200 | 0.166900 | -0.005100 | -0.014200 |
| H6  | H9  | 3.721138 | 0.297536 | 0.216700 | 0.166600 | 0.005300  | -0.012900 |
| F19 | H10 | 1.108672 | 3.331043 | 3.005100 | 0.368100 | 2.455900  | -0.224000 |
| H7  | H9  | 3.530848 | 0.300282 | 0.218700 | 0.170000 | 0.036000  | -0.024800 |
| H8  | H11 | 3.542777 | 0.293143 | 0.213500 | 0.170300 | 0.036300  | -0.024800 |
| F19 | F31 | 4.019401 | 0.633929 | 0.461700 | 0.388300 | 0.381000  | 0.182200  |
| O2  | C18 | 4.003770 | 0.409850 | 0.298500 | 0.142000 | 0.034600  | -0.010300 |
| F28 | H11 | 4.867532 | 2.367933 | 1.724600 | 0.346700 | 0.214800  | -0.040800 |
| O2  | F31 | 3.699132 | 0.221745 | 0.161500 | 0.183800 | 0.495100  | 0.038000  |
| C14 | C4  | 4.297570 | 4.182846 | 1.015900 | 0.193200 | -0.464200 | -0.136300 |
| C13 | C5  | 4.315669 | 4.153201 | 1.008700 | 0.193700 | -0.461600 | -0.143600 |
| F28 | N3  | 4.698069 | 0.932290 | 0.679000 | 0.224000 | 0.084900  | -0.085600 |
| C14 | F24 | 4.682788 | 2.035221 | 0.494300 | 0.290600 | -0.108900 | -0.000200 |
| F28 | C12 | 3.017491 | 1.669598 | 0.405500 | 0.264900 | -0.117500 | 0.052100  |
| F29 | H9  | 4.162635 | 3.781197 | 2.753900 | 0.321300 | 0.348300  | -0.092200 |
| O2  | C21 | 3.959208 | 1.274741 | 0.309600 | 0.119000 | 0.253300  | -0.011400 |
| C21 | C4  | 5.232490 | 5.461293 | 1.326400 | 0.219300 | -0.624900 | -0.205400 |
| O2  | F17 | 4.018515 | 0.508908 | 0.123600 | 0.086800 | -0.078600 | 0.000800  |
| Si1 | H7  | 4.072361 | 0.304127 | 0.221500 | 0.173700 | -0.026900 | -0.050700 |
| Si1 | H11 | 4.110974 | 0.970466 | 0.235700 | 0.176400 | -0.010300 | -0.040000 |
| F24 | H8  | 4.022179 | 2.322486 | 1.691500 | 0.440700 | 0.530300  | 0.105200  |
| F30 | N3  | 5.832738 | 3.112739 | 0.756000 | 0.342500 | -0.937300 | -0.245700 |
| F22 | O2  | 3.936190 | 0.524554 | 0.127400 | 0.090200 | 0.015100  | -0.006700 |
| F23 | H7  | 4.073645 | 5.129432 | 1.245800 | 0.292400 | -0.309300 | -0.049000 |
| F31 | C13 | 3.703545 | 0.594386 | 0.432900 | 0.278200 | 0.278800  | 0.112000  |
| F20 | O2  | 3.962385 | 0.585491 | 0.142200 | 0.084100 | 0.089600  | -0.005200 |
| Si1 | F25 | 4.165232 | 0.346272 | 0.084100 | 0.072200 | -0.022300 | -0.011500 |
| N3  | C12 | 3.628162 | 0.905241 | 0.659300 | 0.111700 | 0.582100  | -0.056000 |
| Si1 | F29 | 4.178261 | 0.347095 | 0.084300 | 0.072200 | -0.022400 | -0.012300 |
| H9  | H8  | 4.130252 | 0.639841 | 0.155400 | 0.135900 | 0.031900  | -0.023200 |
| F31 | H7  | 5.556608 | 4.236372 | 1.028900 | 0.262400 | -0.386300 | -0.224700 |
| O2  | F26 | 3.321679 | 1.816588 | 0.441200 | 0.250900 | -0.106900 | -0.012200 |
| F23 | H6  | 3.656635 | 2.385096 | 1.737100 | 0.348900 | 0.033100  | -0.060600 |
| F20 | F16 | 3.727236 | 1.114987 | 0.270800 | 0.195900 | 0.045600  | 0.006800  |
| F22 | F24 | 4.915701 | 1.991988 | 0.483800 | 0.286100 | -0.153900 | -0.003600 |
| F31 | C5  | 4.741416 | 1.288317 | 0.938300 | 0.267700 | 0.085000  | -0.034300 |
| Si1 | F32 | 4.147993 | 0.363565 | 0.088300 | 0.071300 | 0.028000  | -0.018600 |
| F23 | F17 | 3.778731 | 1.233155 | 0.299500 | 0.187700 | 0.065600  | 0.025900  |

|     |     |          |          |          |          |           |           |
|-----|-----|----------|----------|----------|----------|-----------|-----------|
| C18 | C5  | 5.496821 | 4.820629 | 1.170800 | 0.213000 | -0.552200 | -0.121000 |
| F19 | H11 | 4.060985 | 4.530765 | 1.100400 | 0.274800 | -0.233600 | -0.093100 |
| F31 | H10 | 4.913670 | 2.330724 | 1.697500 | 0.380600 | 0.014100  | -0.085200 |
| O2  | F27 | 4.752308 | 1.516019 | 0.368200 | 0.206000 | -0.006400 | -0.069600 |
| N3  | C18 | 4.805394 | 2.591891 | 0.629500 | 0.168000 | -0.020300 | -0.113300 |
| F32 | H8  | 4.149451 | 3.625357 | 2.640400 | 0.311400 | 0.407100  | -0.103300 |
| F19 | F22 | 5.106397 | 1.138867 | 0.276600 | 0.185200 | 0.101800  | 0.005000  |
| C21 | H6  | 3.866147 | 3.268909 | 2.620900 | 0.368900 | 1.131800  | -0.249300 |
| F28 | H10 | 5.166119 | 2.768035 | 2.016000 | 0.329800 | 0.528300  | -0.150200 |
| F17 | F28 | 4.044097 | 1.551429 | 0.376800 | 0.266200 | -0.083200 | 0.028300  |
| F16 | C14 | 4.115455 | 0.472675 | 0.114800 | 0.092900 | -0.019200 | -0.013900 |
| F24 | H7  | 4.361853 | 4.098440 | 0.995400 | 0.412000 | -0.223000 | 0.161100  |
| F23 | C13 | 4.444673 | 0.445912 | 0.108300 | 0.092600 | 0.003800  | 0.001100  |
| Si1 | H6  | 4.418921 | 1.116222 | 0.271100 | 0.182500 | -0.023100 | -0.106400 |
| F19 | C12 | 4.054183 | 0.436854 | 0.106100 | 0.092000 | 0.004700  | 0.000100  |
| Si1 | H10 | 4.369713 | 1.205157 | 0.292700 | 0.189500 | 0.000200  | -0.110000 |
| N3  | F24 | 3.111294 | 1.004923 | 0.731900 | 0.244700 | 0.883000  | 0.041900  |
| F30 | O2  | 4.641453 | 1.422143 | 0.345400 | 0.224400 | 0.174800  | -0.084700 |
| F16 | N3  | 3.910550 | 0.832882 | 0.606600 | 0.165400 | 0.953300  | -0.034700 |
| C14 | H6  | 4.220298 | 2.255345 | 1.642600 | 0.304200 | 0.295000  | -0.157900 |
| F27 | H9  | 5.425291 | 7.540982 | 1.831500 | 0.287300 | -0.128200 | -0.171600 |
| F19 | C4  | 4.485740 | 3.842339 | 0.933200 | 0.203100 | 0.131800  | -0.129900 |
| F20 | F31 | 3.224204 | 2.120862 | 0.515100 | 0.277500 | 0.225500  | 0.102700  |
| F24 | C4  | 4.078556 | 3.902865 | 0.947900 | 0.325900 | 0.401300  | 0.111700  |
| F30 | H8  | 5.314023 | 7.524512 | 1.827500 | 0.332600 | -0.157100 | -0.261600 |
| F22 | F16 | 4.047530 | 0.705719 | 0.171400 | 0.145300 | -0.094000 | -0.013300 |
| F22 | H8  | 4.541927 | 5.808388 | 1.410700 | 0.252300 | -0.317900 | -0.139500 |
| C13 | H10 | 3.871327 | 2.453061 | 1.786600 | 0.295200 | 0.650400  | -0.196500 |
| F20 | H9  | 4.339854 | 6.055431 | 1.470700 | 0.265600 | -0.188500 | -0.139200 |
| F20 | N3  | 4.580010 | 2.062807 | 0.501000 | 0.169100 | -0.356800 | -0.147600 |
| F20 | F32 | 4.760442 | 1.342678 | 0.326100 | 0.225200 | -0.173400 | -0.091400 |
| C13 | H11 | 4.732479 | 3.647175 | 0.885800 | 0.224000 | -0.138500 | -0.075000 |
| F20 | F23 | 4.618744 | 0.760480 | 0.184700 | 0.151200 | 0.000700  | -0.013400 |
| F31 | H9  | 3.625755 | 2.840394 | 2.068700 | 0.331700 | 1.376200  | 0.075100  |
| C14 | C18 | 4.601786 | 0.489968 | 0.119000 | 0.094400 | -0.032500 | -0.020000 |
| C13 | C15 | 4.308785 | 0.470205 | 0.114200 | 0.093700 | -0.033400 | -0.027100 |
| C14 | H7  | 4.860333 | 3.256024 | 0.790800 | 0.210800 | -0.296800 | -0.101500 |
| C21 | C12 | 4.374064 | 0.546788 | 0.132800 | 0.096100 | -0.023500 | -0.024000 |
| F22 | F25 | 4.812665 | 1.165630 | 0.283100 | 0.203800 | -0.117100 | -0.073200 |

|     |     |          |          |          |          |           |           |
|-----|-----|----------|----------|----------|----------|-----------|-----------|
| F22 | N3  | 4.885769 | 1.745769 | 0.424000 | 0.172700 | -0.245400 | -0.111100 |
| F19 | F17 | 5.034282 | 0.757598 | 0.184000 | 0.156200 | 0.054900  | -0.016900 |
| F27 | C15 | 4.525833 | 0.825946 | 0.200600 | 0.174700 | -0.132800 | -0.117700 |
| F16 | H9  | 3.860589 | 2.067926 | 1.506100 | 0.313600 | 0.973600  | -0.062800 |
| C21 | F26 | 5.522620 | 1.146690 | 0.278500 | 0.181600 | -0.161700 | -0.115700 |
| F30 | C18 | 4.697157 | 1.026463 | 0.249300 | 0.175400 | -0.142800 | -0.109000 |
| O2  | F25 | 4.565584 | 1.194452 | 0.290100 | 0.162800 | -0.265500 | 0.026000  |
| F16 | F29 | 3.577221 | 1.143808 | 0.277800 | 0.200500 | -0.064000 | -0.006200 |
| C14 | C5  | 4.485845 | 2.541659 | 0.617300 | 0.185800 | 0.299200  | -0.088900 |
| F23 | F16 | 4.997123 | 0.797948 | 0.193800 | 0.159600 | -0.007700 | -0.013200 |
| F17 | F29 | 5.284244 | 1.266094 | 0.307500 | 0.223700 | -0.017800 | -0.098300 |
| F19 | F16 | 3.805285 | 0.920234 | 0.223500 | 0.154000 | -0.001500 | 0.023000  |
| F23 | F25 | 5.525271 | 1.079165 | 0.262100 | 0.204900 | -0.048200 | -0.034600 |
| C12 | H8  | 3.877436 | 1.593680 | 1.160700 | 0.241300 | 0.785900  | -0.021000 |
| C13 | C4  | 4.520849 | 2.596832 | 0.630700 | 0.152600 | 0.322400  | -0.129700 |
| F19 | H8  | 3.897330 | 2.117355 | 1.542100 | 0.246900 | 1.145500  | -0.101200 |
| F19 | F23 | 4.981001 | 0.775714 | 0.188400 | 0.157300 | 0.069000  | 0.038600  |
| C18 | H11 | 5.541007 | 5.474468 | 1.329600 | 0.285300 | -0.043700 | -0.041600 |
| F19 | H6  | 4.851375 | 6.792854 | 1.649800 | 0.294300 | 0.242300  | -0.192100 |
| C15 | H8  | 4.227637 | 5.880030 | 1.428100 | 0.317100 | 0.463100  | 0.018500  |
| F30 | C4  | 6.708650 | 3.077330 | 0.747400 | 0.339400 | -1.088800 | -0.290200 |
| C14 | H9  | 4.065293 | 1.757345 | 1.279900 | 0.230700 | 0.854600  | -0.067100 |
| F19 | F32 | 5.885482 | 1.051991 | 0.255500 | 0.188800 | 0.096500  | -0.012400 |
| F29 | C12 | 4.531734 | 0.710248 | 0.172500 | 0.118800 | -0.049500 | -0.050900 |
| C12 | H9  | 3.987066 | 1.543564 | 1.124200 | 0.231300 | 0.772300  | -0.081400 |
| F22 | C18 | 4.927949 | 0.899648 | 0.218500 | 0.177000 | -0.068400 | -0.030500 |
| C14 | F25 | 5.164508 | 0.772420 | 0.187600 | 0.121000 | -0.053800 | -0.049200 |
| F32 | C13 | 5.207555 | 0.625430 | 0.151900 | 0.130700 | -0.042400 | -0.053900 |
| F32 | N3  | 5.702362 | 2.753292 | 0.668700 | 0.174300 | -0.530500 | -0.059200 |
| F26 | H8  | 4.358351 | 5.602519 | 1.360700 | 0.394000 | -0.224300 | -0.046800 |
| C13 | H8  | 4.194057 | 4.455417 | 1.082100 | 0.201100 | 0.791300  | -0.121400 |
| N3  | C15 | 3.768079 | 3.569357 | 0.866900 | 0.154300 | 0.723400  | -0.018800 |
| C21 | C5  | 5.416720 | 3.557416 | 0.864000 | 0.250700 | 0.005300  | -0.122100 |
| F22 | F27 | 4.646615 | 1.225332 | 0.297600 | 0.228300 | -0.162100 | -0.051600 |
| F20 | C15 | 5.292293 | 1.039227 | 0.252400 | 0.177200 | -0.008400 | -0.056900 |
| F16 | H11 | 5.518931 | 3.133326 | 0.761000 | 0.341300 | 0.062400  | 0.066600  |
| O2  | F29 | 4.971554 | 1.187041 | 0.288300 | 0.155900 | 0.083700  | 0.027900  |
| F17 | C21 | 4.211092 | 1.028110 | 0.249700 | 0.181400 | 0.005000  | 0.000000  |
| F30 | H9  | 5.895059 | 6.244830 | 1.516700 | 0.471500 | -0.055300 | -0.196300 |

|     |     |          |           |          |          |           |           |
|-----|-----|----------|-----------|----------|----------|-----------|-----------|
| F16 | C5  | 4.708319 | 3.335078  | 0.810000 | 0.218100 | 0.633200  | -0.009600 |
| F27 | C14 | 4.617181 | 0.814418  | 0.197800 | 0.143300 | -0.069100 | -0.050000 |
| F30 | C12 | 4.516107 | 0.877002  | 0.213000 | 0.142100 | -0.083300 | -0.050000 |
| F32 | F26 | 6.202969 | 0.970878  | 0.235800 | 0.214600 | -0.290700 | -0.134700 |
| C13 | F26 | 5.092595 | 0.867944  | 0.210800 | 0.138700 | -0.032000 | -0.057000 |
| C12 | C4  | 4.332123 | 2.894106  | 0.702900 | 0.135200 | 0.595300  | -0.006000 |
| F29 | C5  | 6.575983 | 4.475180  | 1.086900 | 0.282500 | -1.098800 | -0.071400 |
| F20 | F26 | 5.989005 | 1.342266  | 0.326000 | 0.231600 | -0.054300 | -0.089600 |
| F30 | F17 | 4.268509 | 1.151631  | 0.279700 | 0.240000 | -0.049900 | -0.009000 |
| F30 | H6  | 5.152685 | 3.567827  | 2.598500 | 0.475600 | 0.889600  | -0.359700 |
| F32 | C4  | 6.403323 | 4.294427  | 1.043000 | 0.237100 | -1.075600 | -0.100100 |
| C18 | H10 | 5.286612 | 7.713500  | 1.873400 | 0.294500 | 0.422600  | -0.162400 |
| F23 | C5  | 3.702484 | 1.234632  | 0.899200 | 0.207900 | 0.955600  | -0.026200 |
| C21 | H7  | 5.902466 | 3.631117  | 0.881900 | 0.219300 | -0.370900 | -0.174400 |
| C12 | C5  | 4.426506 | 2.589832  | 0.629000 | 0.128700 | 0.573700  | -0.035200 |
| C21 | H9  | 4.640228 | 7.007369  | 1.701900 | 0.299400 | 0.872500  | -0.063600 |
| F27 | F25 | 4.849165 | 1.032639  | 0.250800 | 0.210600 | -0.121500 | -0.125800 |
| F30 | C5  | 6.531604 | 3.790048  | 0.920500 | 0.434800 | -0.547400 | -0.255500 |
| F30 | F29 | 5.442448 | 1.079989  | 0.262300 | 0.209700 | -0.140600 | -0.109700 |
| C13 | F24 | 4.274783 | 0.822653  | 0.199800 | 0.138600 | -0.059500 | -0.000300 |
| F28 | C14 | 5.061266 | 0.730423  | 0.177400 | 0.138600 | -0.042600 | 0.004700  |
| F31 | H11 | 5.003908 | 4.433183  | 1.076700 | 0.247500 | 0.720400  | -0.076900 |
| C18 | C15 | 4.405983 | 0.723835  | 0.175800 | 0.131100 | -0.088800 | -0.036500 |
| F20 | C5  | 5.469900 | 2.124568  | 0.516000 | 0.206700 | -0.736000 | -0.143300 |
| C21 | C15 | 5.566947 | 0.877414  | 0.213100 | 0.134000 | -0.087000 | -0.052600 |
| F27 | N3  | 5.291813 | 2.588185  | 0.628600 | 0.192000 | 0.327900  | -0.143700 |
| C21 | H10 | 5.843854 | 5.950849  | 1.445300 | 0.374200 | -0.091400 | -0.176300 |
| O2  | F32 | 4.889537 | 1.183747  | 0.287500 | 0.123400 | 0.353200  | 0.029400  |
| F22 | C4  | 5.694562 | 1.763886  | 0.428400 | 0.193000 | -0.728600 | -0.119200 |
| C12 | H7  | 4.900960 | 2.194975  | 0.533100 | 0.248000 | 0.192300  | 0.053500  |
| N3  | F29 | 5.799407 | 2.844286  | 0.690800 | 0.208400 | -0.224900 | -0.070800 |
| C21 | C18 | 5.075514 | 0.684720  | 0.166300 | 0.125900 | 0.016200  | -0.021100 |
| F32 | H6  | 5.101694 | 10.580020 | 2.569600 | 0.384500 | 0.539700  | -0.138700 |
| F31 | C12 | 4.973628 | 0.829240  | 0.201400 | 0.125100 | 0.118900  | 0.023900  |
| F19 | H7  | 4.594134 | 3.146502  | 0.764200 | 0.203300 | 0.499400  | -0.108700 |
| F30 | H10 | 5.823426 | 9.074706  | 2.204000 | 0.559600 | 0.523600  | -0.331500 |
| F17 | N3  | 4.696750 | 1.533312  | 0.372400 | 0.125800 | 0.469700  | -0.080300 |
| F28 | C4  | 4.773855 | 3.510066  | 0.852500 | 0.219900 | 1.245300  | -0.061600 |
| C14 | H10 | 5.219366 | 3.819282  | 0.927600 | 0.283400 | 0.139200  | -0.124700 |

|     |     |          |           |          |          |           |           |
|-----|-----|----------|-----------|----------|----------|-----------|-----------|
| C4  | C15 | 4.453924 | 3.350724  | 0.813800 | 0.215900 | 0.455200  | 0.042800  |
| C12 | H11 | 4.983252 | 2.156272  | 0.523700 | 0.249300 | 0.242800  | 0.037000  |
| F27 | C5  | 6.481909 | 3.352783  | 0.814300 | 0.234300 | -0.462100 | -0.131900 |
| F28 | C15 | 3.773169 | 1.609072  | 0.390800 | 0.292800 | -0.142000 | 0.063500  |
| F16 | H7  | 5.357416 | 3.938274  | 0.956500 | 0.316500 | 0.601900  | 0.073200  |
| F16 | C4  | 4.558029 | 4.026386  | 0.977900 | 0.201600 | 1.267600  | 0.020200  |
| F24 | H11 | 3.299468 | 4.485062  | 1.089300 | 0.378200 | 0.759300  | 0.112500  |
| C15 | H7  | 4.893332 | 2.971925  | 0.721800 | 0.333100 | -0.143900 | 0.114900  |
| C21 | F24 | 6.098159 | 2.036456  | 0.494600 | 0.310200 | -0.100400 | 0.001700  |
| F16 | H8  | 3.795354 | 3.019850  | 2.199400 | 0.281600 | 1.947600  | 0.004600  |
| N3  | F26 | 3.899101 | 2.902753  | 0.705000 | 0.256800 | 0.640500  | -0.064900 |
| C13 | H6  | 5.183597 | 3.929216  | 0.954300 | 0.240800 | 0.292900  | -0.176500 |
| F30 | F27 | 4.460441 | 1.099752  | 0.267100 | 0.195700 | -0.164500 | -0.069100 |
| F27 | F26 | 5.570075 | 0.981995  | 0.238500 | 0.207200 | -0.149800 | -0.103800 |
| F27 | F24 | 4.829618 | 1.036345  | 0.251700 | 0.197600 | -0.087300 | -0.110400 |
| C14 | H11 | 5.001307 | 2.695237  | 0.654600 | 0.175300 | 0.384600  | -0.069700 |
| F30 | F28 | 5.629126 | 1.233155  | 0.299500 | 0.207700 | -0.096400 | -0.132600 |
| C13 | H7  | 4.993529 | 2.412373  | 0.585900 | 0.164500 | 0.377100  | -0.093000 |
| F31 | F26 | 6.124065 | 1.273917  | 0.309400 | 0.221900 | -0.096200 | -0.114300 |
| F30 | F26 | 6.043592 | 1.121574  | 0.272400 | 0.200400 | -0.116500 | -0.085400 |
| F23 | H9  | 3.164921 | 3.056098  | 2.225800 | 0.224900 | 1.918700  | -0.016400 |
| F24 | C5  | 2.940350 | 3.839045  | 0.932400 | 0.265000 | 1.395500  | 0.068000  |
| F32 | C12 | 5.298812 | 0.633665  | 0.153900 | 0.121100 | -0.062700 | -0.042500 |
| F28 | H7  | 5.148632 | 5.032262  | 1.222200 | 0.269700 | 1.001500  | -0.036000 |
| F28 | F24 | 3.561225 | 1.753180  | 0.425800 | 0.349300 | -0.178000 | 0.068800  |
| F23 | H11 | 4.402666 | 4.441830  | 1.078800 | 0.223000 | 0.715800  | -0.028300 |
| C13 | F25 | 5.168948 | 0.571081  | 0.138700 | 0.115000 | 0.004800  | -0.023500 |
| F29 | C14 | 5.668362 | 0.550905  | 0.133800 | 0.114700 | 0.011000  | -0.015500 |
| F26 | C4  | 4.547639 | 3.424837  | 0.831800 | 0.328500 | 0.018000  | -0.016600 |
| F24 | H6  | 4.219662 | 6.826616  | 1.658000 | 0.344900 | 1.309300  | 0.123500  |
| F23 | H10 | 4.198041 | 6.024139  | 1.463100 | 0.284800 | 0.953200  | -0.039800 |
| F29 | H10 | 5.302115 | 10.324330 | 2.507500 | 0.387800 | 0.795200  | -0.123600 |
| F31 | F24 | 6.496663 | 1.658069  | 0.402700 | 0.353700 | -0.108700 | 0.006300  |
| F29 | H11 | 6.186676 | 6.409937  | 1.556800 | 0.336600 | -0.104700 | 0.006500  |
| F24 | C18 | 4.390916 | 1.013287  | 0.246100 | 0.174200 | -0.094400 | -0.016900 |
| F31 | C18 | 5.096260 | 1.796001  | 0.436200 | 0.291400 | 0.316200  | 0.112300  |
| F22 | F28 | 5.340350 | 0.826358  | 0.200700 | 0.180100 | -0.077200 | 0.008700  |
| F27 | H11 | 6.721368 | 4.499061  | 1.092700 | 0.336700 | -0.152800 | -0.051700 |
| F17 | F32 | 4.953183 | 1.136397  | 0.276000 | 0.221200 | -0.119700 | -0.045700 |

|     |     |          |          |          |          |           |           |
|-----|-----|----------|----------|----------|----------|-----------|-----------|
| F20 | F24 | 5.438867 | 1.149984 | 0.279300 | 0.179000 | -0.014300 | -0.019700 |
| F23 | C18 | 5.668271 | 0.459088 | 0.111500 | 0.097400 | -0.027000 | -0.010700 |
| F24 | H9  | 2.041968 | 3.579910 | 2.607300 | 0.314700 | 2.205100  | 0.016900  |
| C18 | C4  | 5.262245 | 3.967096 | 0.963500 | 0.155200 | 0.847300  | -0.094900 |
| F19 | C15 | 4.974959 | 0.435619 | 0.105800 | 0.096700 | -0.005300 | -0.002000 |
| F20 | H8  | 5.053022 | 3.300492 | 0.801600 | 0.236500 | 0.447000  | -0.149200 |
| F16 | C21 | 5.168389 | 0.501909 | 0.121900 | 0.096800 | 0.007200  | -0.013400 |
| F17 | H9  | 5.549399 | 3.400956 | 0.826000 | 0.243700 | 0.417100  | -0.119300 |
| F31 | C15 | 6.141409 | 0.842416 | 0.204600 | 0.166900 | -0.014100 | -0.032200 |
| F20 | H10 | 4.869227 | 6.529753 | 1.585900 | 0.329400 | 0.323400  | -0.207300 |
| F22 | F29 | 6.048888 | 1.022757 | 0.248400 | 0.216900 | 0.001900  | -0.047400 |
| F32 | C15 | 6.387065 | 1.011640 | 0.245700 | 0.174100 | -0.133900 | -0.060400 |
| F28 | H8  | 3.998298 | 2.739613 | 1.995300 | 0.238800 | 2.242100  | -0.048500 |
| F28 | C21 | 5.787578 | 0.970466 | 0.235700 | 0.149400 | 0.066000  | -0.019000 |
| C21 | H11 | 5.721414 | 3.587473 | 0.871300 | 0.221900 | 0.497400  | -0.117000 |
| F20 | C4  | 5.407528 | 2.023692 | 0.491500 | 0.182100 | 0.080500  | -0.149000 |
| F30 | C15 | 5.892457 | 0.901706 | 0.219000 | 0.145100 | -0.097900 | -0.055700 |
| F20 | F25 | 6.110123 | 1.133515 | 0.275300 | 0.214800 | 0.048800  | -0.065900 |
| C18 | F26 | 5.465616 | 0.783949 | 0.190400 | 0.144700 | -0.079800 | -0.051900 |
| C18 | F25 | 4.927268 | 1.002582 | 0.243500 | 0.168600 | -0.071200 | -0.032700 |
| F26 | H7  | 4.571590 | 3.898335 | 0.946800 | 0.421500 | -0.199600 | 0.064300  |
| F27 | C21 | 5.040051 | 0.898412 | 0.218200 | 0.147600 | -0.017200 | -0.031400 |
| F31 | F17 | 5.063943 | 0.902530 | 0.219200 | 0.178200 | 0.176700  | 0.051500  |
| F30 | H7  | 6.835204 | 3.265906 | 0.793200 | 0.326000 | -0.325200 | -0.255100 |
| F17 | H8  | 4.575597 | 4.105028 | 0.997000 | 0.233100 | 0.653900  | -0.037900 |
| F22 | H6  | 5.774725 | 5.182135 | 1.258600 | 0.304600 | -0.041200 | -0.152800 |
| F28 | H6  | 5.446582 | 8.096004 | 1.966300 | 0.264700 | 1.397100  | -0.097700 |
| F22 | H9  | 5.390751 | 4.394480 | 1.067300 | 0.244100 | 0.606100  | -0.091200 |
| C21 | F29 | 5.936713 | 0.927234 | 0.225200 | 0.166400 | 0.038900  | -0.010200 |
| F31 | F28 | 5.821479 | 1.694302 | 0.411500 | 0.313200 | 0.361900  | 0.097000  |
| F22 | H7  | 5.850847 | 2.677944 | 0.650400 | 0.224200 | -0.300900 | -0.069000 |
| F22 | C5  | 5.663242 | 1.963167 | 0.476800 | 0.183700 | 0.277200  | -0.096900 |
| C5  | C15 | 4.066299 | 3.695760 | 0.897600 | 0.172000 | 1.095800  | 0.013600  |
| F30 | F16 | 5.058559 | 0.816476 | 0.198300 | 0.156600 | -0.097400 | -0.050700 |
| F20 | H11 | 5.814005 | 2.756586 | 0.669500 | 0.220000 | -0.196400 | -0.073800 |
| F23 | F27 | 5.823576 | 0.776950 | 0.188700 | 0.158600 | -0.056100 | -0.057900 |
| F19 | F24 | 4.610712 | 0.845710 | 0.205400 | 0.173800 | -0.061300 | 0.034300  |
| F28 | F25 | 4.176876 | 1.876290 | 0.455700 | 0.329700 | -0.143700 | 0.089500  |
| C15 | H9  | 3.559736 | 8.455863 | 2.053700 | 0.248200 | 1.524900  | -0.037200 |

|     |     |          |          |          |          |           |           |
|-----|-----|----------|----------|----------|----------|-----------|-----------|
| F23 | F28 | 5.957443 | 0.824711 | 0.200300 | 0.174900 | -0.056800 | 0.022600  |
| C12 | H6  | 5.216990 | 5.565874 | 1.351800 | 0.160600 | 0.713700  | -0.023600 |
| C15 | H11 | 4.512619 | 3.638529 | 0.883700 | 0.298800 | 0.552500  | 0.083400  |
| F32 | F24 | 6.991214 | 2.111392 | 0.512800 | 0.352700 | -0.080900 | 0.029100  |
| F32 | H7  | 6.622455 | 4.125615 | 1.002000 | 0.259500 | -0.380700 | -0.070000 |
| C18 | H8  | 4.631516 | 7.015192 | 1.703800 | 0.192400 | 1.623800  | -0.092200 |
| F19 | F26 | 5.729650 | 0.819770 | 0.199100 | 0.154800 | 0.009700  | -0.039100 |
| F16 | H10 | 5.209975 | 6.957137 | 1.689700 | 0.225300 | 1.116800  | -0.013400 |
| C12 | H10 | 5.341302 | 5.478174 | 1.330500 | 0.153800 | 0.634200  | -0.051400 |
| F30 | H11 | 6.732384 | 3.693702 | 0.897100 | 0.402400 | 0.111100  | -0.230500 |
| F17 | C5  | 5.783155 | 1.837587 | 0.446300 | 0.143800 | 0.361200  | -0.068900 |
| F25 | H8  | 5.062793 | 6.877672 | 1.670400 | 0.345000 | 0.920000  | 0.065500  |
| N3  | F25 | 4.864403 | 3.291434 | 0.799400 | 0.163200 | 0.921300  | 0.015500  |
| C18 | H7  | 5.702018 | 4.070030 | 0.988500 | 0.196600 | 0.765100  | -0.059800 |
| F17 | C4  | 5.170228 | 2.051690 | 0.498300 | 0.130000 | 0.551600  | -0.028100 |
| F30 | F24 | 6.507727 | 1.544429 | 0.375100 | 0.269600 | -0.145100 | -0.021700 |
| F16 | F31 | 5.662132 | 0.914882 | 0.222200 | 0.156800 | 0.178900  | 0.044500  |
| F27 | H10 | 6.571162 | 5.738393 | 1.393700 | 0.282500 | 0.230900  | -0.158800 |
| F28 | F26 | 4.942784 | 1.407732 | 0.341900 | 0.258500 | -0.097300 | 0.038300  |
| F32 | C5  | 6.105645 | 3.717994 | 0.903000 | 0.237000 | 0.413900  | -0.059800 |
| F31 | F29 | 5.779321 | 1.982518 | 0.481500 | 0.349200 | 0.349900  | 0.157300  |
| C18 | H6  | 5.930109 | 6.038138 | 1.466500 | 0.224200 | 0.904500  | -0.132900 |
| C15 | H6  | 4.967974 | 6.051313 | 1.469700 | 0.234300 | 1.020400  | 0.036600  |
| F20 | H6  | 5.958461 | 3.601061 | 0.874600 | 0.286900 | 0.020200  | -0.203300 |
| F16 | H6  | 5.385488 | 9.236519 | 2.243300 | 0.200200 | 1.400700  | 0.011600  |
| F24 | H10 | 3.737447 | 9.591437 | 2.329500 | 0.271000 | 1.678000  | 0.085400  |
| F32 | H10 | 6.804683 | 5.737981 | 1.393600 | 0.367700 | -0.007800 | -0.105300 |
| F32 | H9  | 5.406829 | 8.629205 | 2.095800 | 0.294200 | 1.317200  | -0.026600 |
| F17 | H11 | 6.289850 | 1.748651 | 0.424700 | 0.243600 | 0.136600  | 0.014500  |
| F29 | C15 | 5.612189 | 0.622136 | 0.151100 | 0.122100 | -0.038300 | -0.047300 |
| F25 | H7  | 5.959949 | 3.192616 | 0.775400 | 0.376400 | 0.013700  | 0.185800  |
| F32 | C18 | 6.352388 | 0.621313 | 0.150900 | 0.136700 | -0.035100 | -0.058500 |
| C21 | F25 | 6.584426 | 0.774479 | 0.188100 | 0.126000 | -0.039000 | -0.049300 |
| F31 | F27 | 5.349583 | 1.492962 | 0.362600 | 0.250400 | 0.278600  | 0.076600  |
| F27 | C4  | 5.703549 | 3.628235 | 0.881200 | 0.187100 | 1.125100  | -0.117600 |
| F17 | H7  | 5.728120 | 2.065278 | 0.501600 | 0.227500 | 0.249300  | 0.038800  |
| F25 | C4  | 5.451354 | 3.503890 | 0.851000 | 0.246000 | 0.757200  | 0.096800  |
| F20 | H7  | 5.918440 | 1.905935 | 0.462900 | 0.177700 | 0.282300  | -0.101800 |
| F22 | H10 | 6.371793 | 3.276611 | 0.795800 | 0.288300 | 0.239600  | -0.139800 |

|     |     |          |          |          |          |           |           |
|-----|-----|----------|----------|----------|----------|-----------|-----------|
| F26 | H6  | 5.012329 | 5.173076 | 1.256400 | 0.353900 | 0.624700  | -0.033600 |
| F26 | C5  | 4.236436 | 2.812994 | 0.683200 | 0.244300 | 1.197300  | -0.032500 |
| F22 | H11 | 6.131018 | 2.292557 | 0.556800 | 0.177100 | 0.309600  | -0.055600 |
| F27 | H8  | 5.058424 | 8.124003 | 1.973100 | 0.230200 | 1.722500  | -0.125500 |
| F26 | H9  | 4.092119 | 8.662968 | 2.104000 | 0.265400 | 1.514900  | -0.070000 |
| F29 | C4  | 6.158764 | 3.567298 | 0.866400 | 0.205100 | 0.828200  | -0.064100 |
| F16 | F32 | 6.200986 | 0.480087 | 0.116600 | 0.108300 | -0.018300 | -0.025500 |
| F23 | F29 | 6.732123 | 0.470205 | 0.114200 | 0.102900 | 0.024200  | 0.002000  |
| F19 | F25 | 5.900137 | 0.474734 | 0.115300 | 0.103200 | 0.029400  | 0.003800  |
| F26 | H11 | 4.577401 | 4.443065 | 1.079100 | 0.334200 | 0.711500  | 0.036300  |
| F27 | H7  | 6.345483 | 4.781925 | 1.161400 | 0.259500 | 0.881000  | -0.076900 |
| C15 | H10 | 5.013691 | 8.424983 | 2.046200 | 0.176700 | 1.194900  | 0.009100  |
| F27 | F32 | 6.229960 | 0.869179 | 0.211100 | 0.186300 | -0.126600 | -0.076900 |
| F25 | H11 | 5.599220 | 3.972860 | 0.964900 | 0.340700 | 0.586600  | 0.146200  |
| F29 | F24 | 5.461792 | 0.888531 | 0.215800 | 0.166300 | -0.049300 | -0.005600 |
| F25 | H9  | 4.524265 | 9.432918 | 2.291000 | 0.275500 | 1.657600  | -0.011400 |
| F25 | C5  | 5.127442 | 3.629059 | 0.881400 | 0.196500 | 1.224800  | 0.056800  |
| F32 | F25 | 7.357258 | 0.890178 | 0.216200 | 0.176300 | -0.102200 | -0.074600 |
| F30 | F25 | 6.751051 | 0.934234 | 0.226900 | 0.164100 | -0.032800 | -0.048100 |
| F29 | F26 | 6.692438 | 0.951938 | 0.231200 | 0.162700 | -0.018800 | -0.069000 |
| F17 | H10 | 6.595404 | 4.177494 | 1.014600 | 0.195400 | 0.462300  | -0.098400 |
| F32 | H11 | 6.467248 | 4.545999 | 1.104100 | 0.209600 | 0.791800  | -0.049900 |
| F29 | H8  | 5.596737 | 7.773202 | 1.887900 | 0.217900 | 1.654900  | -0.066100 |
| F32 | F28 | 6.996726 | 0.815241 | 0.198000 | 0.141700 | 0.057800  | -0.026000 |
| F29 | F25 | 6.072887 | 0.831299 | 0.201900 | 0.169600 | -0.024600 | -0.056000 |
| F32 | F29 | 7.242272 | 0.840769 | 0.204200 | 0.185400 | -0.015800 | -0.066500 |
| F31 | F25 | 7.256414 | 0.793831 | 0.192800 | 0.156300 | 0.049100  | -0.015900 |
| F17 | H6  | 6.159808 | 4.824746 | 1.171800 | 0.182300 | 0.536300  | -0.057500 |
| F29 | H6  | 6.687377 | 6.104839 | 1.482700 | 0.293800 | 0.907100  | -0.107000 |
| F29 | H7  | 6.553376 | 4.370187 | 1.061400 | 0.228600 | 0.812600  | -0.027900 |
| F27 | H6  | 6.620101 | 7.679737 | 1.865200 | 0.220600 | 0.987200  | -0.143300 |
| F26 | H10 | 5.144985 | 7.916487 | 1.922700 | 0.266500 | 1.260700  | -0.050900 |
| F25 | H6  | 5.915988 | 7.548393 | 1.833300 | 0.255300 | 1.375100  | 0.093700  |
| F25 | H10 | 5.926081 | 9.416860 | 2.287100 | 0.194700 | 1.494700  | 0.057100  |

---



Table S5. Effective Cartesian coordinates (Å) of atoms in (C<sub>2</sub>F<sub>5</sub>)<sub>3</sub>SiONMe<sub>2</sub> refined in conf1MD model.

| N  | At | An | Mass        | X               | Y               | Z               |
|----|----|----|-------------|-----------------|-----------------|-----------------|
| 1  | Si | 14 | 27.97692653 | 0.149533944174  | -0.077126532691 | 0.275554136165  |
| 2  | O  | 8  | 15.99491462 | -0.062028308834 | -0.861722725590 | 1.820533579052  |
| 3  | N  | 7  | 14.00307401 | 1.014838779565  | -0.321193721336 | 2.704907179352  |
| 4  | C  | 6  | 12.00000000 | 1.760857211066  | -1.521938578870 | 3.114008261511  |
| 5  | C  | 6  | 12.00000000 | 0.282465536811  | 0.310711725027  | 3.813275124674  |
| 6  | H  | 1  | 1.00782503  | 2.559386625378  | -1.198938918959 | 3.787431311341  |
| 7  | H  | 1  | 1.00782503  | 1.116702921260  | -2.249249524277 | 3.626923375414  |
| 8  | H  | 1  | 1.00782503  | 2.209820544680  | -1.983915150870 | 2.235654972194  |
| 9  | H  | 1  | 1.00782503  | -0.311630121350 | 1.138784935976  | 3.430198428233  |
| 10 | H  | 1  | 1.00782503  | 1.024825700827  | 0.705451228612  | 4.512513405221  |
| 11 | H  | 1  | 1.00782503  | -0.371053566159 | -0.402650449591 | 4.334230578991  |
| 12 | C  | 6  | 12.00000000 | -1.241013840316 | -0.932892151981 | -0.819493776738 |
| 13 | C  | 6  | 12.00000000 | -0.422130518987 | 1.809653468562  | 0.345601541584  |
| 14 | C  | 6  | 12.00000000 | 1.809602563853  | -0.648903832575 | -0.620966287493 |
| 15 | C  | 6  | 12.00000000 | -1.886646095280 | -2.199132274900 | -0.242140303842 |
| 16 | F  | 9  | 18.99840320 | -2.245841909579 | -0.024631580681 | -0.962812956415 |
| 17 | F  | 9  | 18.99840320 | -0.736444727090 | -1.262512706964 | -2.034976792070 |
| 18 | C  | 6  | 12.00000000 | -1.782061776732 | 2.153984895959  | -0.277519546544 |
| 19 | F  | 9  | 18.99840320 | -0.490446159982 | 2.211711527880  | 1.643098348686  |
| 20 | F  | 9  | 18.99840320 | 0.507452900647  | 2.557261059032  | -0.303838666719 |
| 21 | C  | 6  | 12.00000000 | 2.933565793279  | 0.361905694929  | -0.896493868071 |
| 22 | F  | 9  | 18.99840320 | 1.441696112267  | -1.139188900270 | -1.835035891032 |
| 23 | F  | 9  | 18.99840320 | 2.362119585813  | -1.643497043531 | 0.131425643663  |
| 24 | F  | 9  | 18.99840320 | -2.361693524283 | -1.951887280699 | 0.977807633837  |
| 25 | F  | 9  | 18.99840320 | -2.886489290087 | -2.605206959429 | -1.013736744869 |
| 26 | F  | 9  | 18.99840320 | -0.989444917153 | -3.177592216254 | -0.156501788823 |
| 27 | F  | 9  | 18.99840320 | -1.764594780821 | 1.937850080680  | -1.586717455751 |
| 28 | F  | 9  | 18.99840320 | -2.735065381982 | 1.389913866205  | 0.267352988875  |
| 29 | F  | 9  | 18.99840320 | -2.086860818220 | 3.425783393780  | -0.058173050692 |
| 30 | F  | 9  | 18.99840320 | 2.452623010490  | 1.422457185868  | -1.539440727527 |
| 31 | F  | 9  | 18.99840320 | 3.496849328371  | 0.769765550216  | 0.236611501989  |
| 32 | F  | 9  | 18.99840320 | 3.870975527816  | -0.201676034741 | -1.649895086001 |

NMR-Spectra:

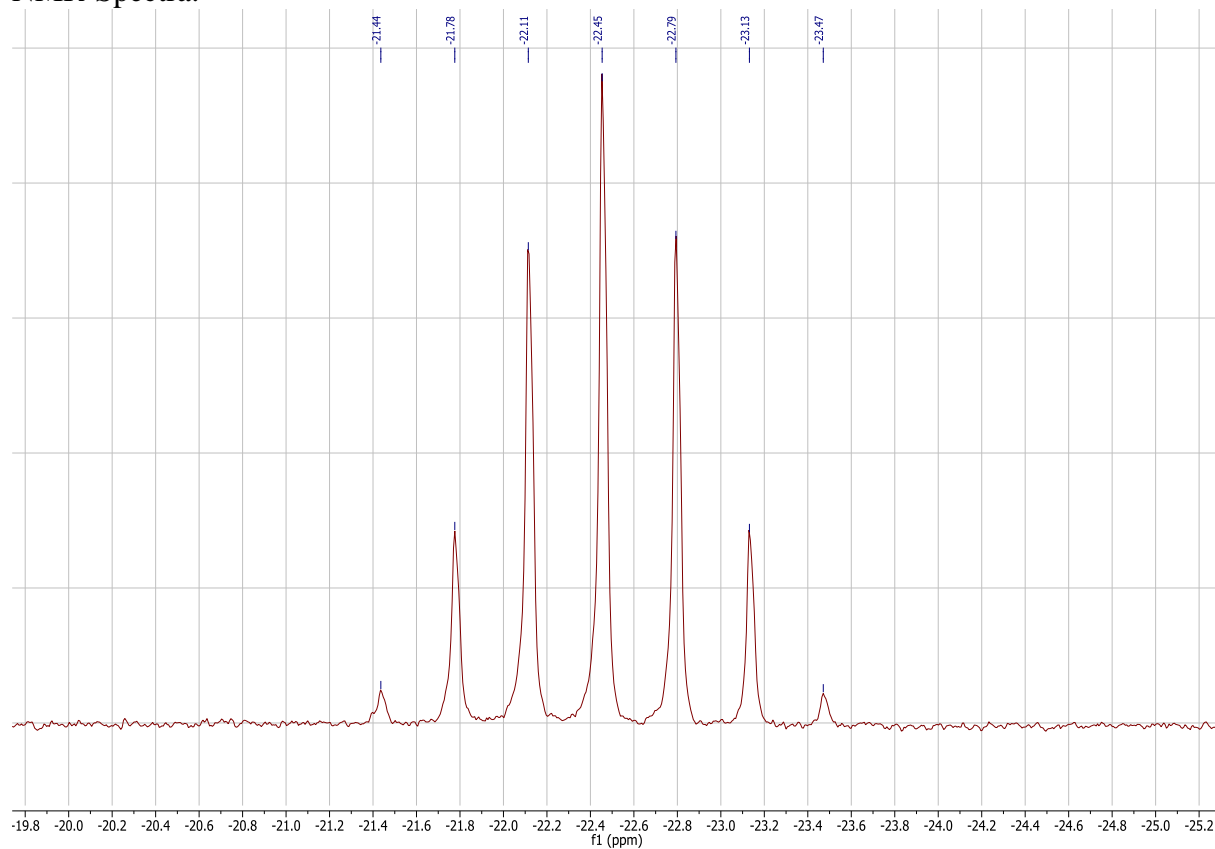

**Figure S5:**  $^{29}\text{Si}\{^1\text{H}\}$  NMR of a solution of  $(\text{C}_2\text{F}_5)_3\text{SiCH}_2\text{OME}$  in  $\text{C}_6\text{D}_6$ , measured at 293K, 99 MHz.

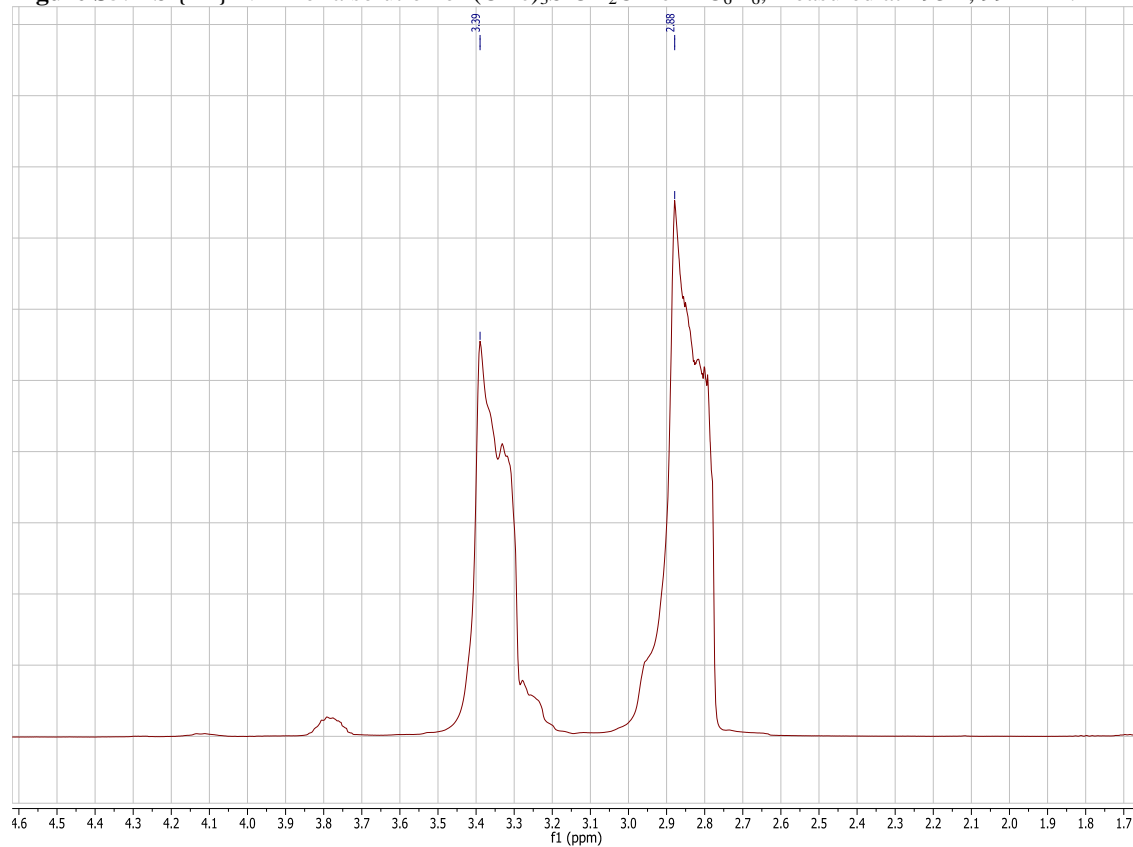

**Figure S6:**  $^1\text{H}$  NMR of a solution of  $(\text{C}_2\text{F}_5)_3\text{SiCH}_2\text{OME}$  in  $\text{C}_6\text{D}_6$ , measured at 293K, 500 MHz.

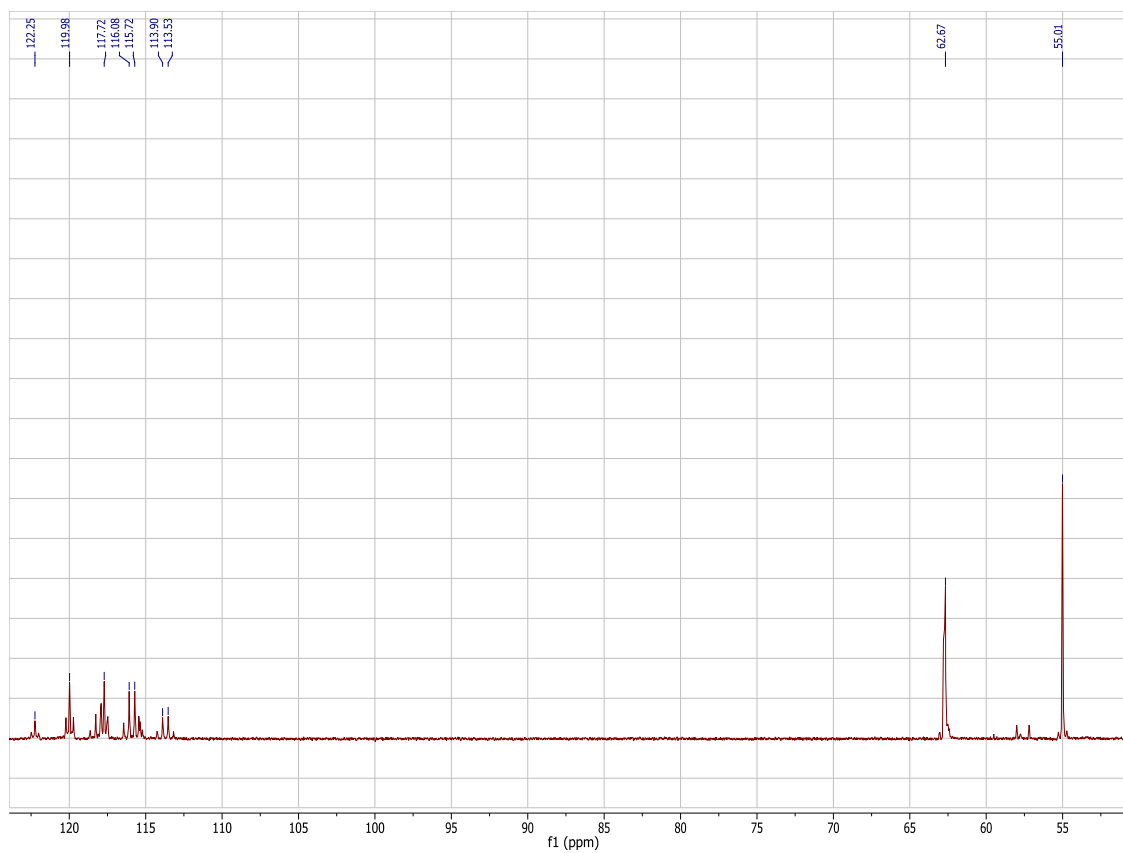

**Figure S7:**  $^{13}\text{C}\{^1\text{H}\}$  NMR of a solution of  $(\text{C}_2\text{F}_5)_3\text{SiCH}_2\text{OMe}$  in  $\text{C}_6\text{D}_6$ , measured at 293K, 126 MHz.

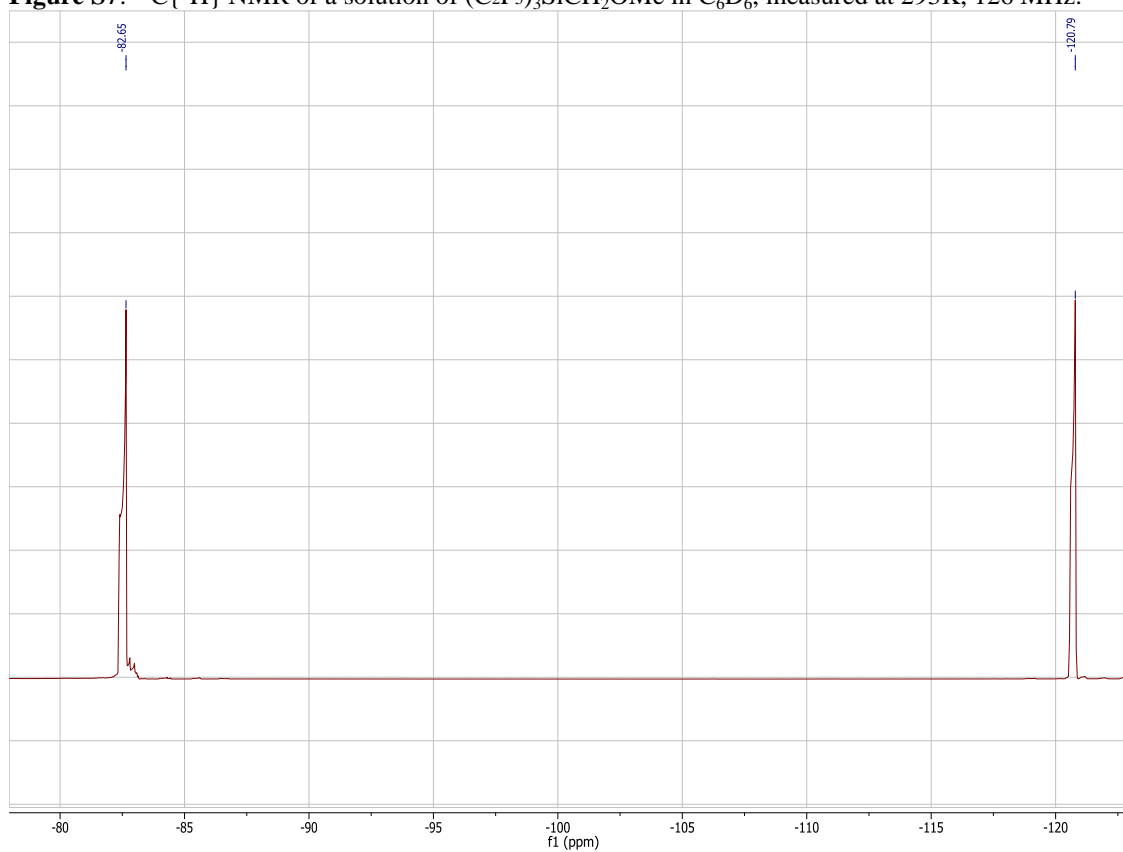

**Figure S8:**  $^{19}\text{F}\{^1\text{H}\}$  NMR of a solution of  $(\text{C}_2\text{F}_5)_3\text{SiCH}_2\text{OMe}$  in  $\text{C}_6\text{D}_6$ , measured at 293K, 470 MHz.

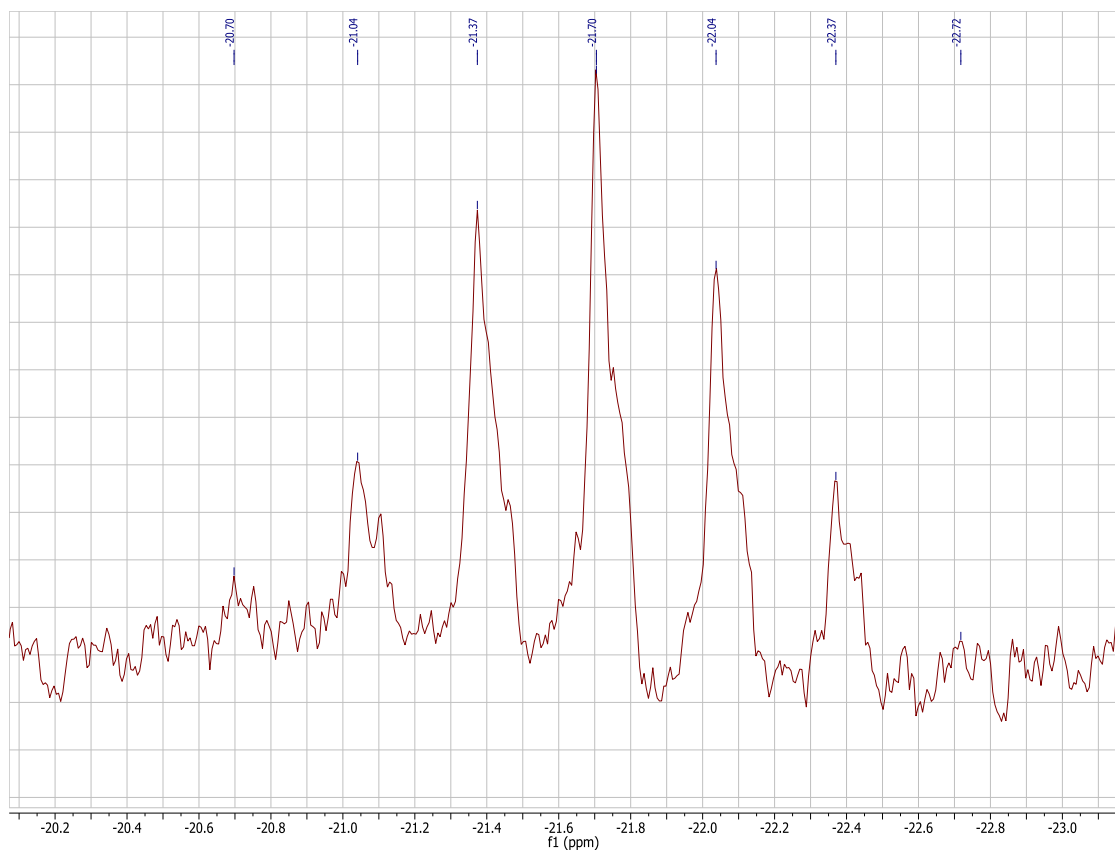

**Figure S9:**  $^{29}\text{Si}\{^1\text{H}\}$  NMR of a solution of  $(\text{C}_2\text{F}_5)_3\text{SiCH}_2\text{NMe}_2$  in  $\text{C}_6\text{D}_6$ , measured at 293K, 99 MHz.

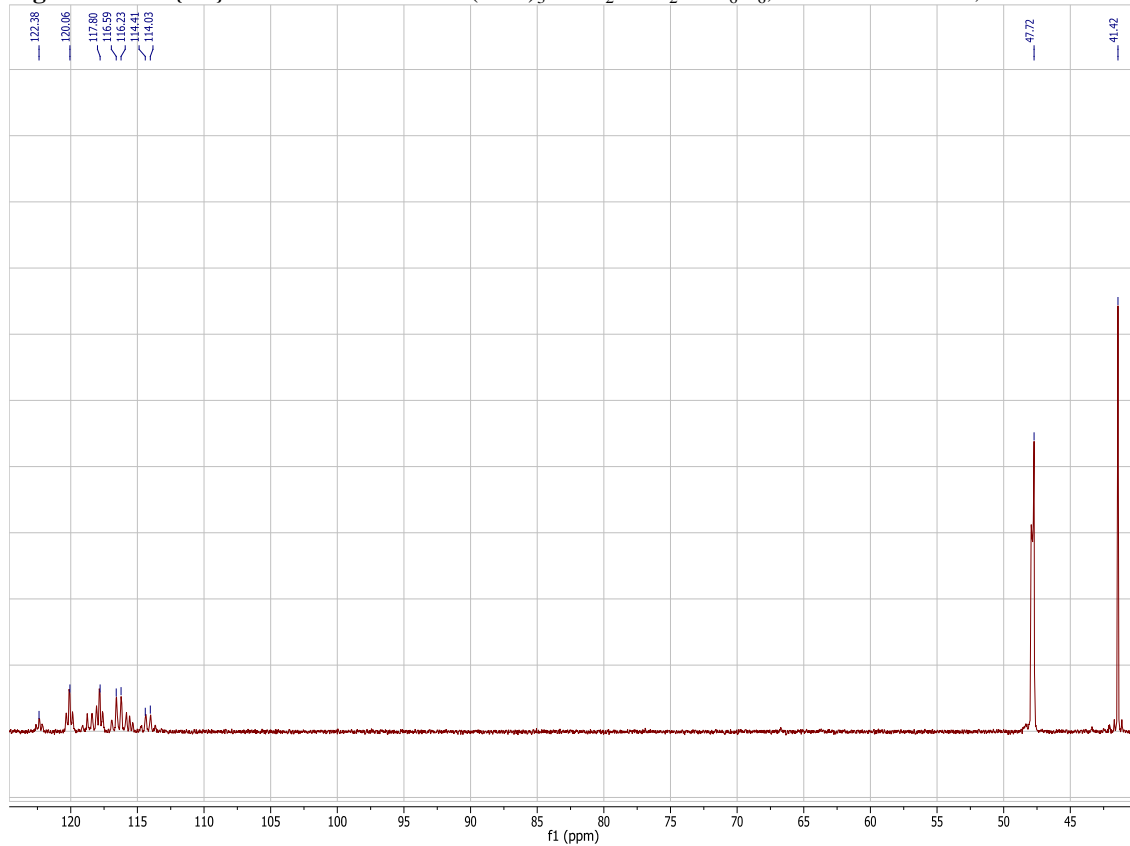

**Figure S10:**  $^{13}\text{C}\{^1\text{H}\}$  NMR of a solution of  $(\text{C}_2\text{F}_5)_3\text{SiCH}_2\text{NMe}_2$  in  $\text{C}_6\text{D}_6$ , measured at 293K, 126 MHz.

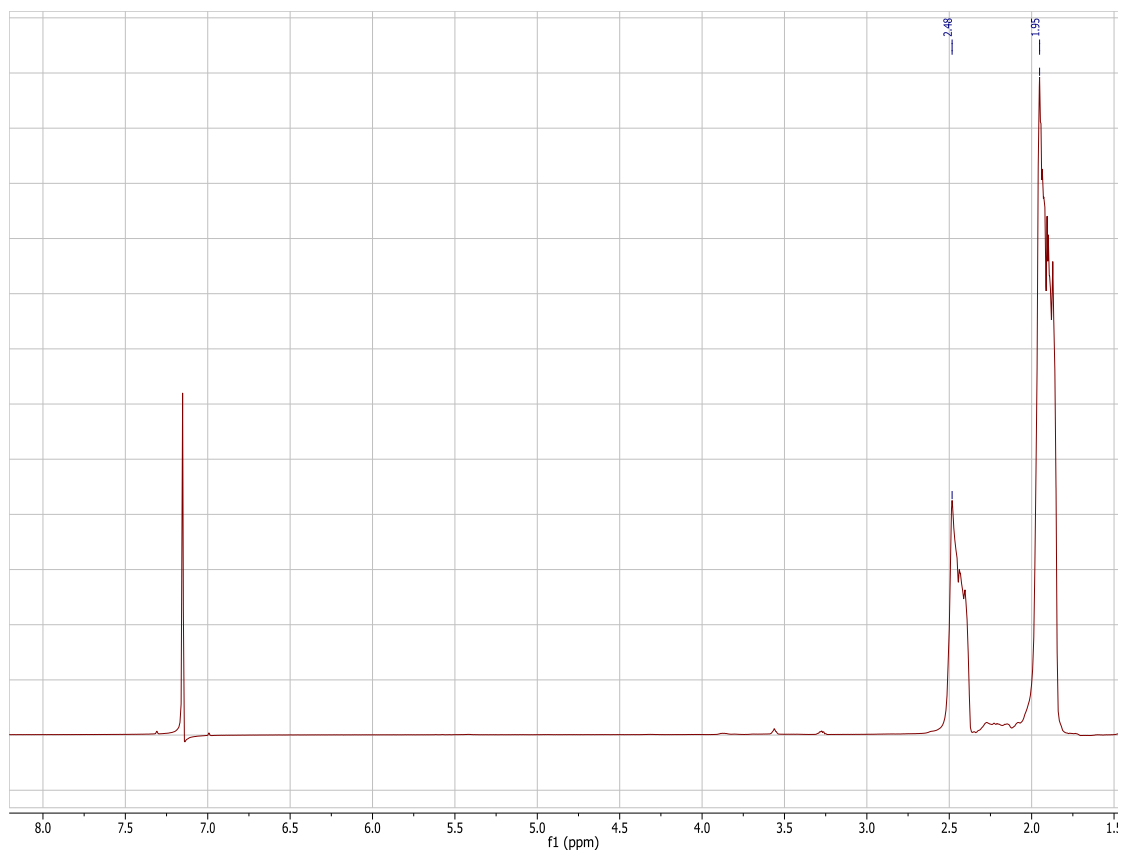

**Figure S11:**  $^1\text{H}$  NMR of a solution of  $(\text{C}_2\text{F}_5)_3\text{SiCH}_2\text{NMe}_2$  in  $\text{C}_6\text{D}_6$ , measured at 293K, 500 MHz.

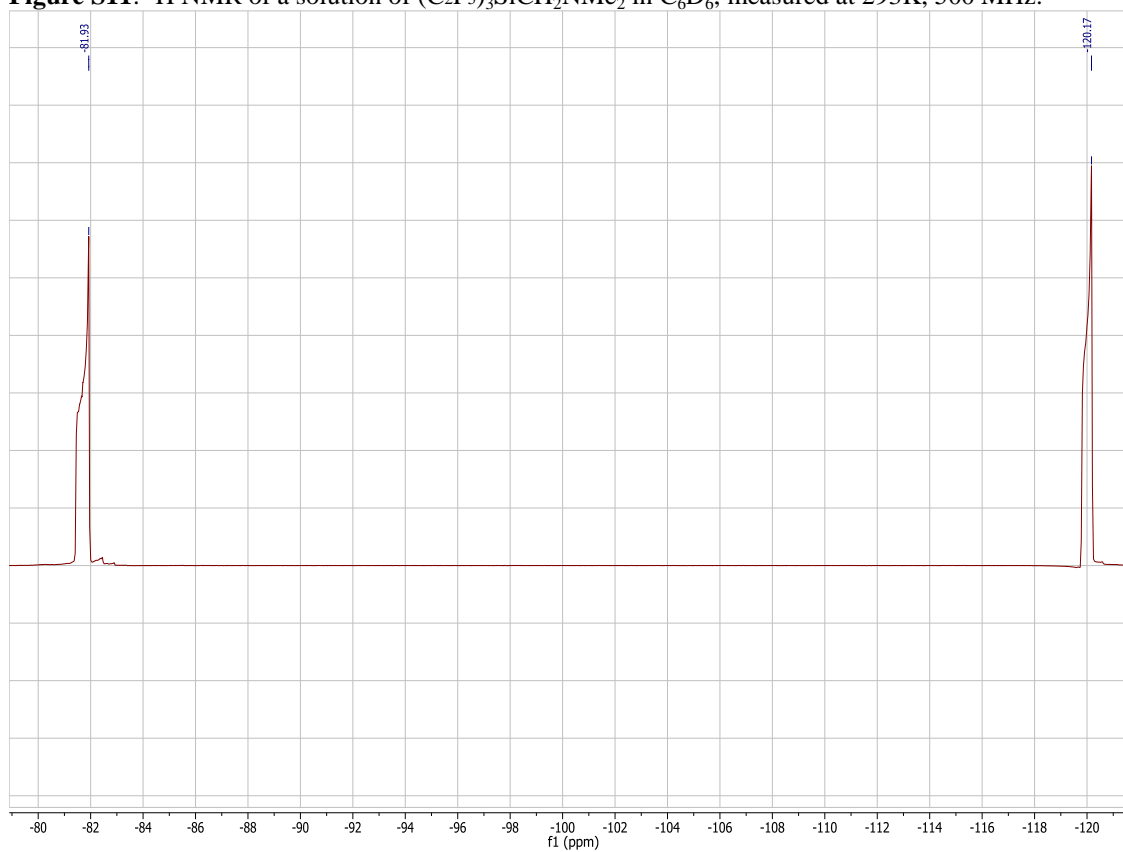

**Figure S12:**  $^{19}\text{F}\{^1\text{H}\}$  NMR of a solution of  $(\text{C}_2\text{F}_5)_3\text{SiCH}_2\text{NMe}_2$  in  $\text{C}_6\text{D}_6$ , measured at 293K, 470 MHz.

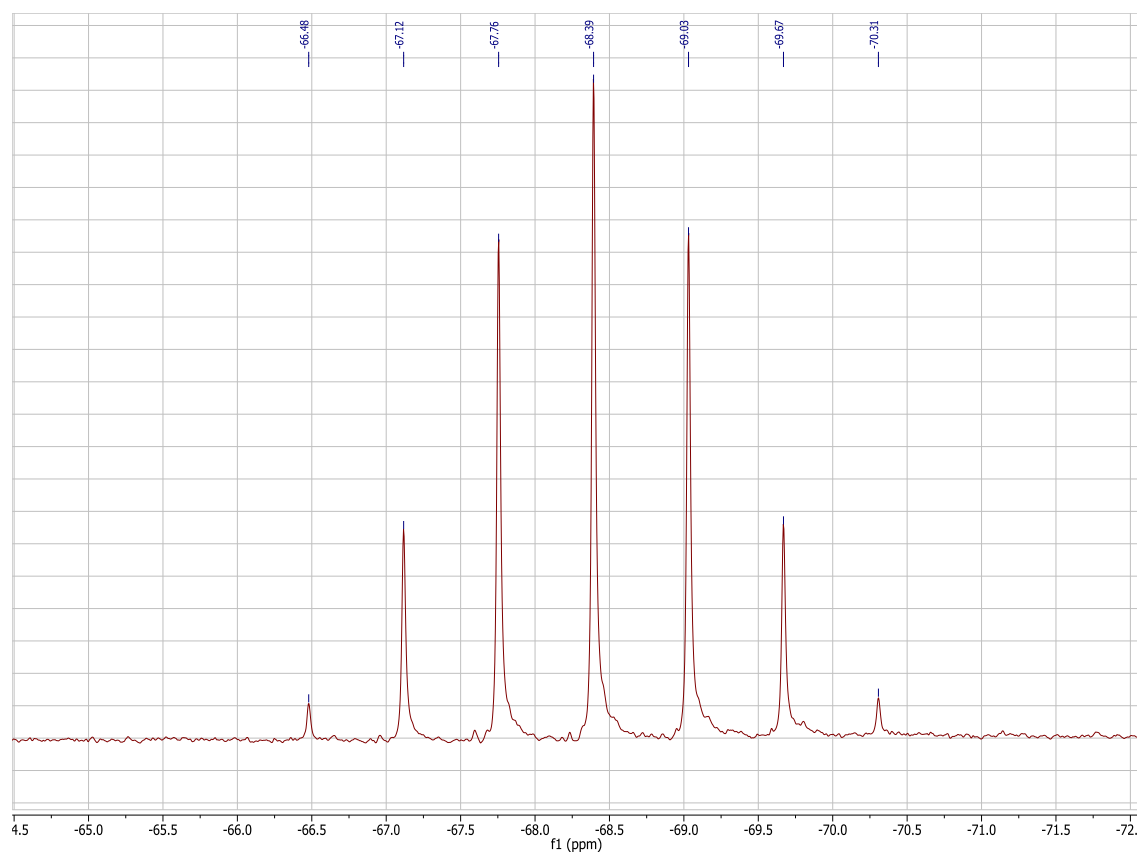

**Figure S13:**  $^{29}\text{Si}\{^1\text{H}\}$  NMR of a solution of  $(\text{C}_2\text{F}_5)_3\text{SiONMe}_2$  in  $\text{C}_6\text{D}_6$ , measured at 293K, 99 MHz.

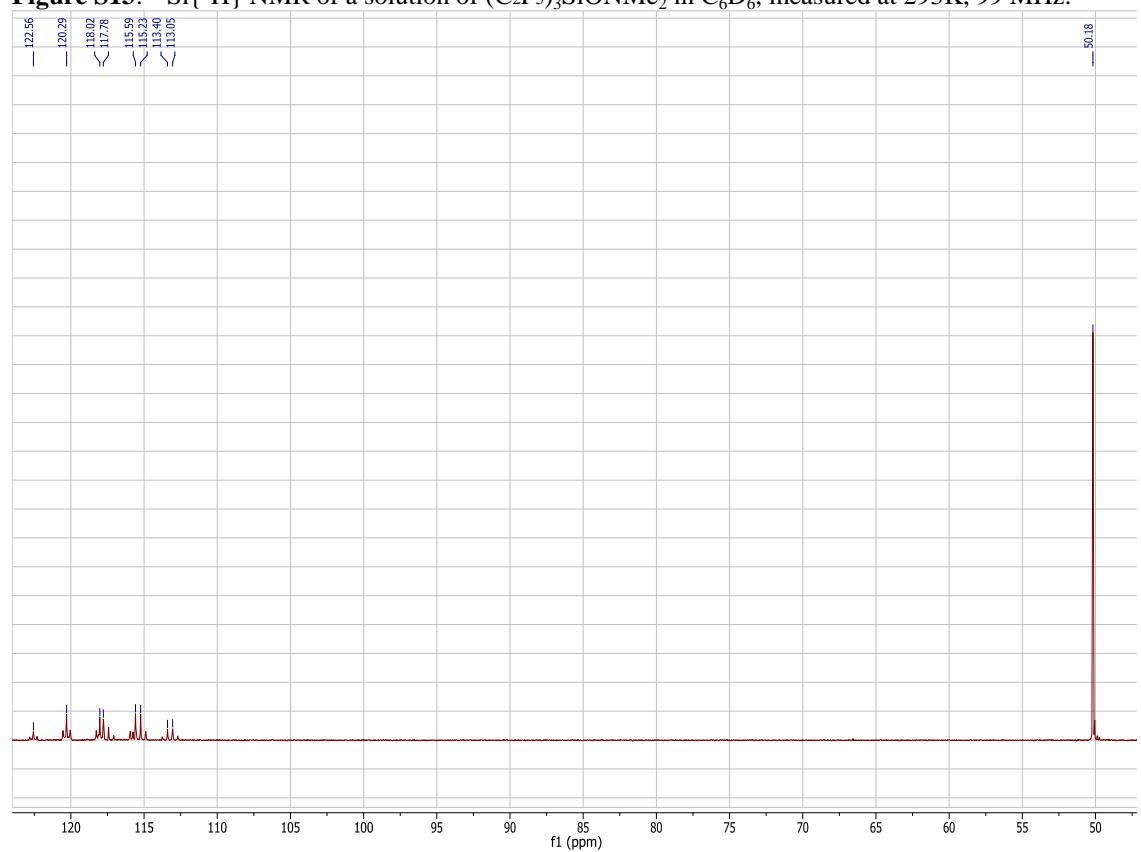

**Figure S14:**  $^{13}\text{C}\{^1\text{H}\}$  NMR of a solution of  $(\text{C}_2\text{F}_5)_3\text{SiONMe}_2$  in  $\text{C}_6\text{D}_6$ , measured at 293K, 126 MHz.

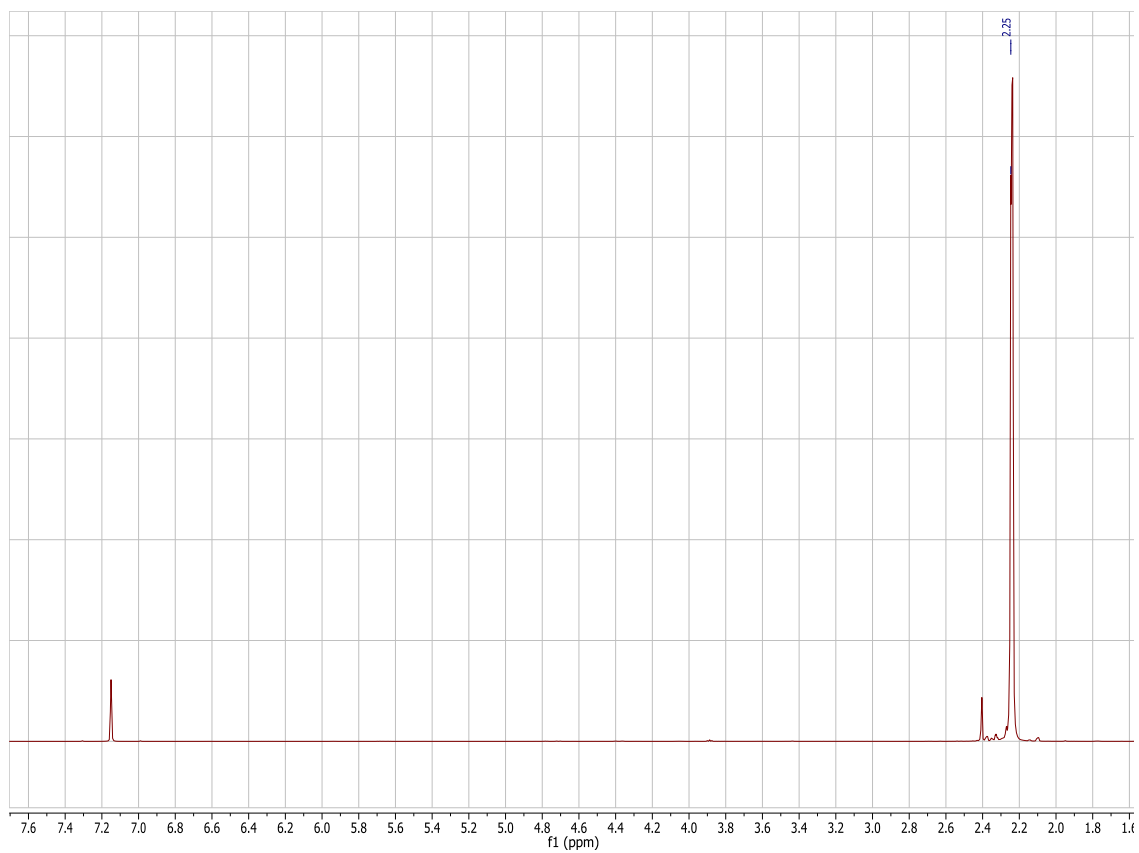

**Figure S15:**  $^1\text{H}$  NMR of a solution of  $(\text{C}_2\text{F}_5)_3\text{SiONMe}_2$  in  $\text{C}_6\text{D}_6$ , measured at 293K, 500 MHz.

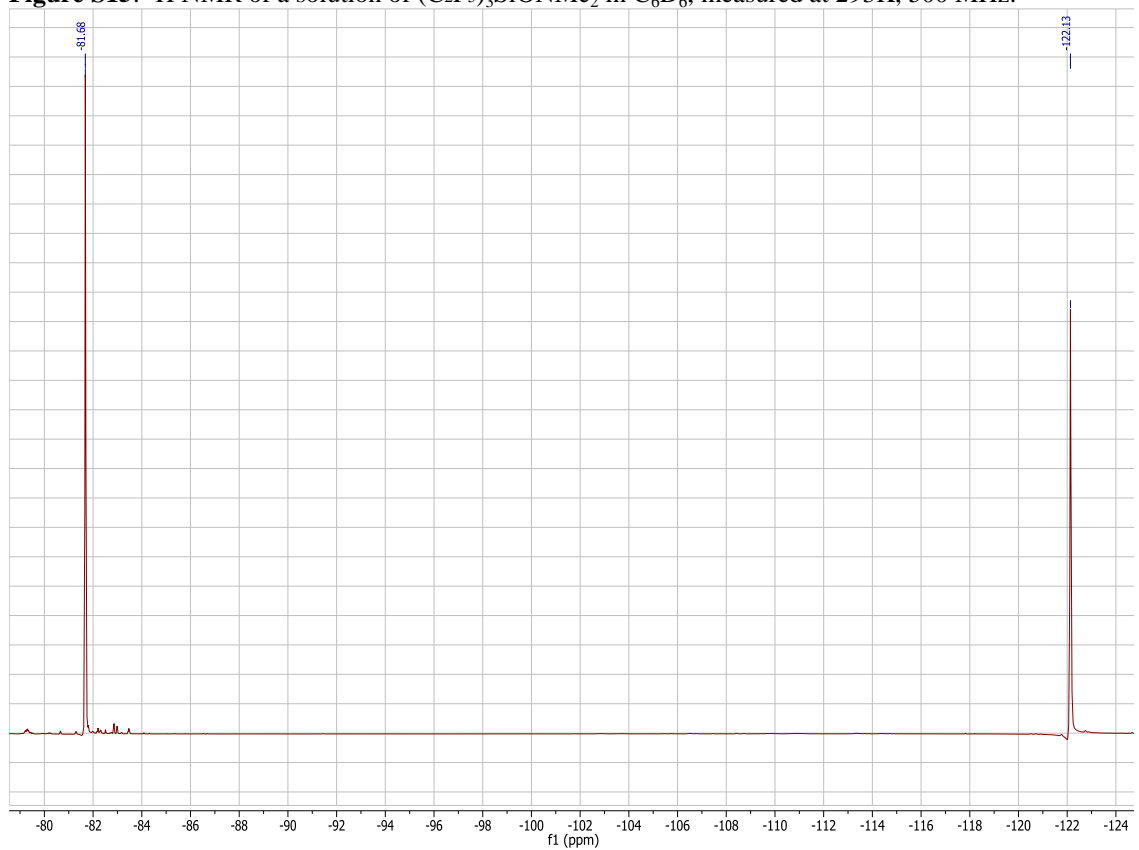

**Figure S16:**  $^{19}\text{F}\{^1\text{H}\}$  NMR of a solution of  $(\text{C}_2\text{F}_5)_3\text{SiONMe}_2$  in  $\text{C}_6\text{D}_6$ , measured at 293K, 470 MHz.
